# Supplementary material for: Visible-light-induced C(sp3)–H bromination of 4-methylthiophene derivatives with HBr/H2O2
Source: Royal Society of Chemistry journal article supplement (doi:10.1039/d4ob00547c), 2024-01-01

## Supporting information

### Visible-light-induced C(sp<sup>3</sup>)-H bromination of 4-methylthiophene derivatives with HBr/H<sub>2</sub>O<sub>2</sub>

Wenbo Song, Ming Ma, Wenjing Zhang, Ranran Feng, Congcong Lu, Hong-Yu Zhang\*, Yuecheng Zhang\*, Jiquan Zhao

#### Contents

|                              |   |
|------------------------------|---|
| 1. Photoreaction Setup ..... | 2 |
| 2. NMR Charts .....          | 3 |

---

## 1. Photoreaction Setup

Reactions were irradiated using a photo-reactor (Manufacturer: Xuzhou Fancai, Model: KL-647,  $\lambda_{\text{max}} = 438 \text{ nm}$ ) shown in Figure S1. In order to keep the reaction temperature at room temperature, a simple cooling fan was installed above the reaction vessel. Borosilicate glass vessel was used for the reaction without any filter. Reaction vessel is secured by a three-claw clamp to keep a constant distance of 4 cm between the reaction vessel and the light source.

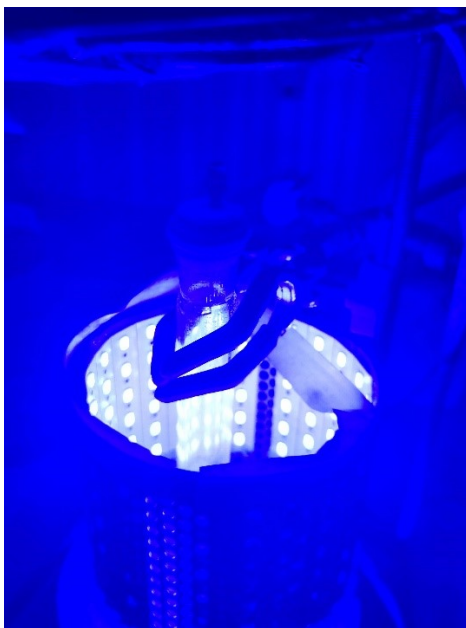

Figure S1. Photo-reactor (photographed by author Wenbo Song)

## 2.NMR Charts

$^1\text{H}$ ,  $^{13}\text{C}$  and  $^{19}\text{F}$  NMR Spectrum of **2a** in  $\text{CDCl}_3$

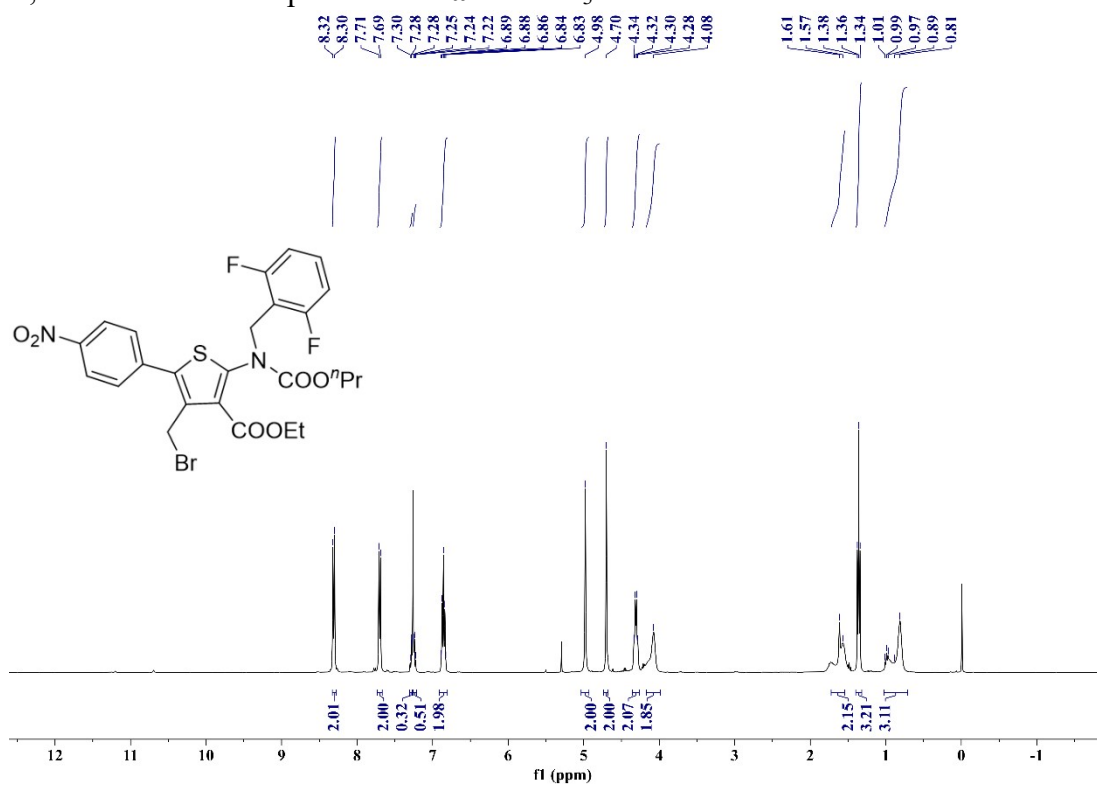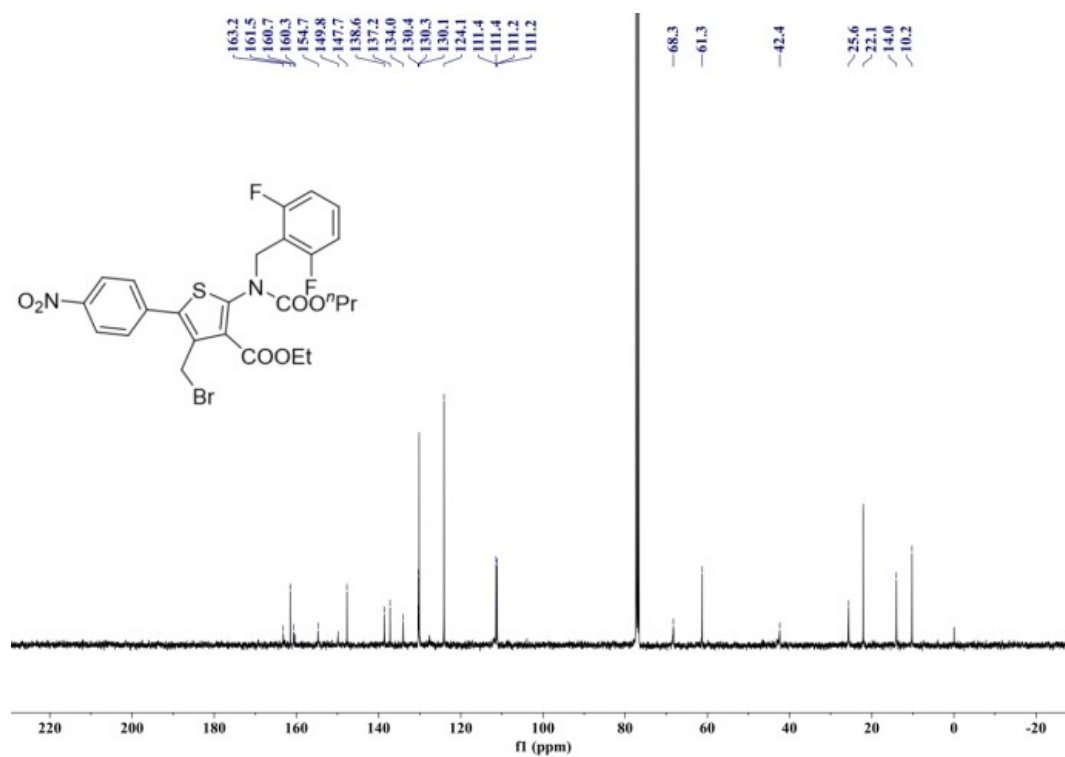

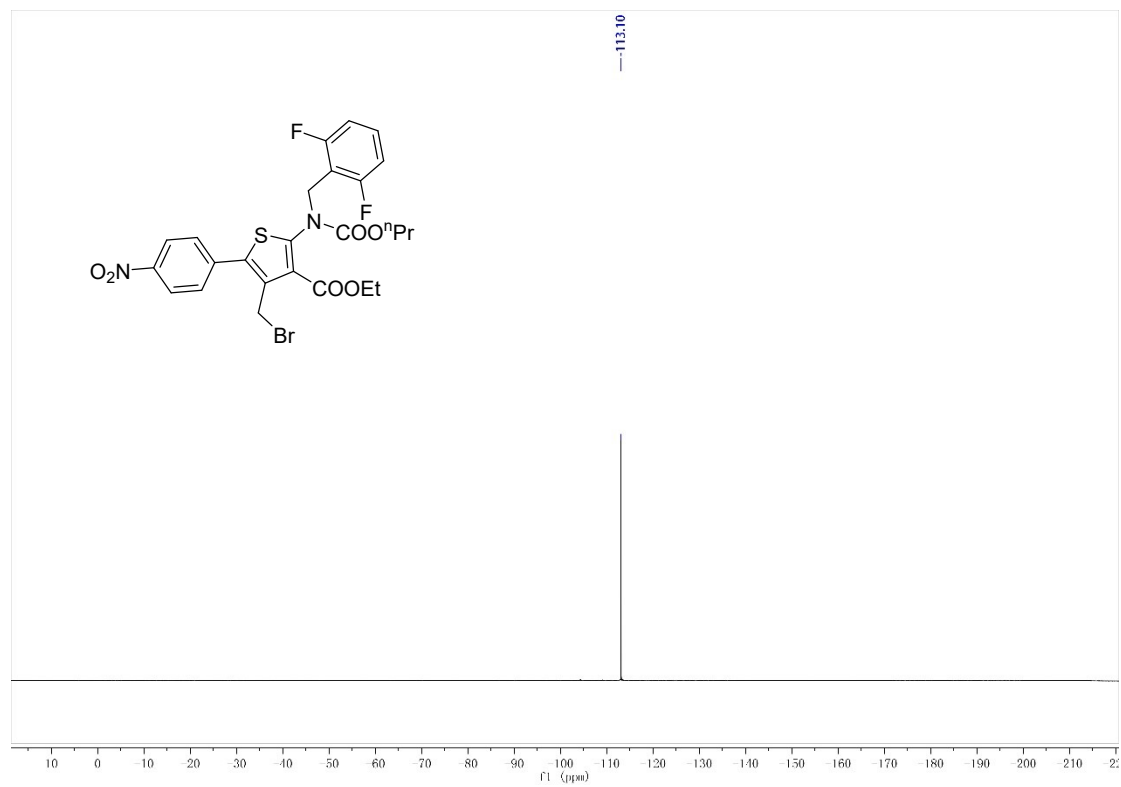

<sup>1</sup>H NMR and <sup>13</sup>C NMR Spectrum of **2c** in CDCl<sub>3</sub>

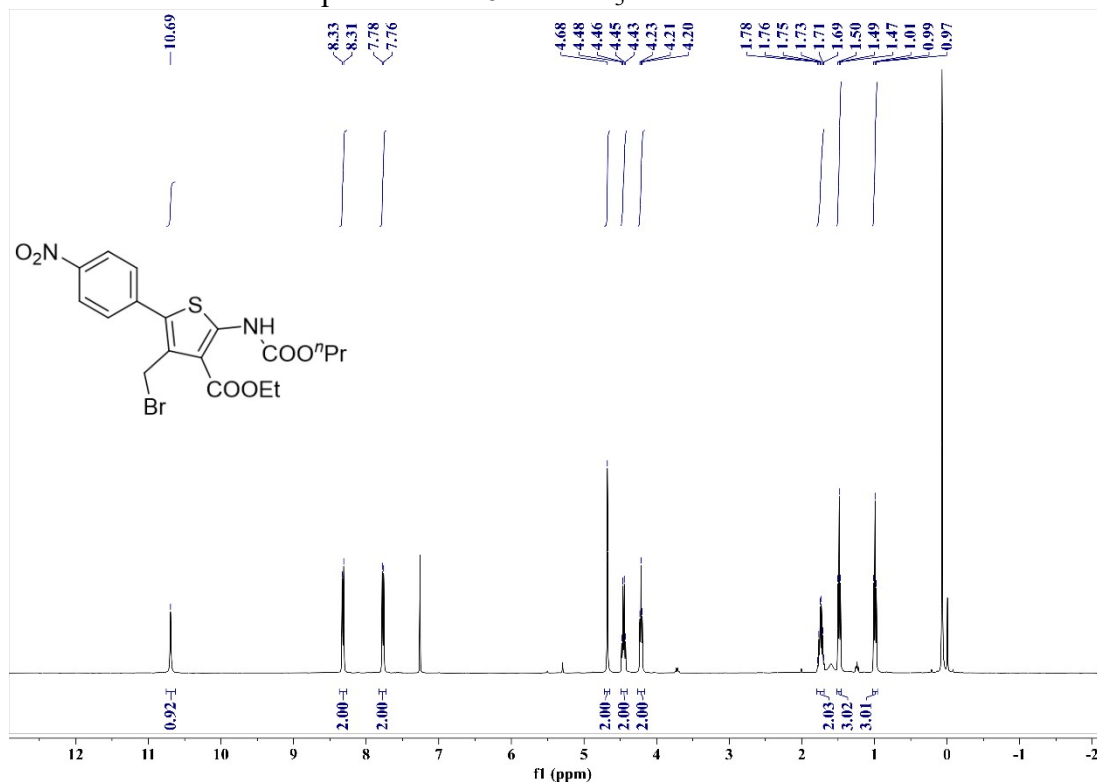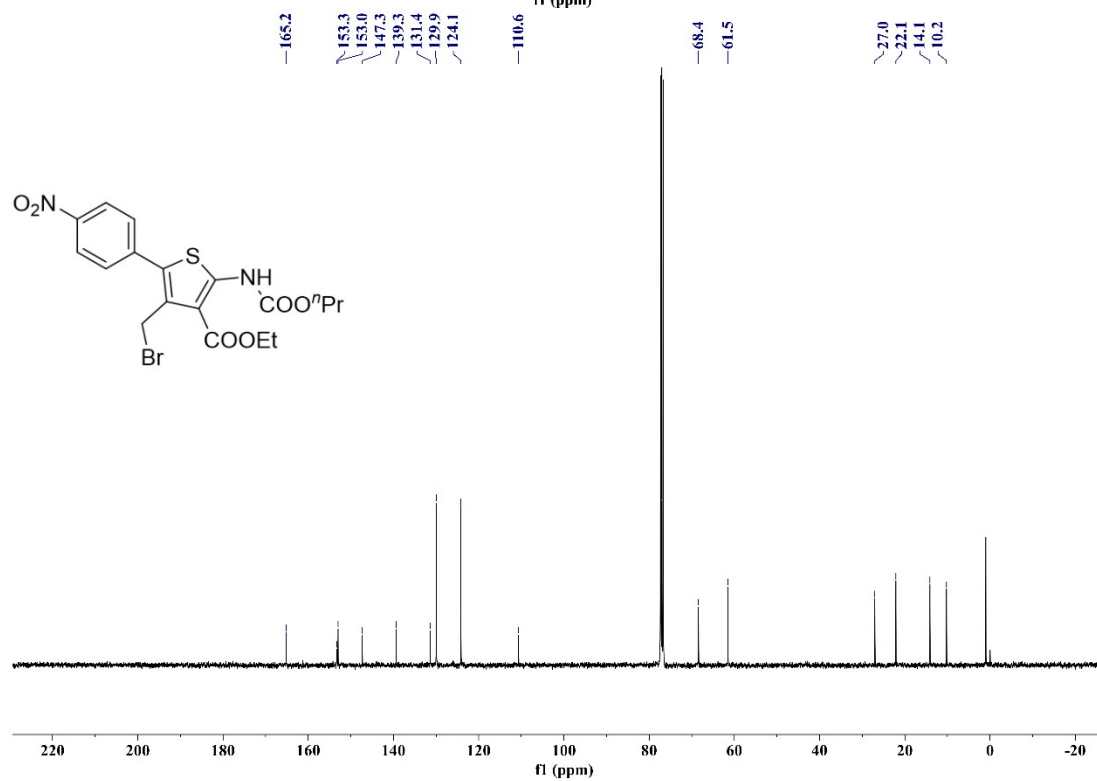

$^1\text{H}$  NMR and  $^{13}\text{C}$  NMR Spectrum of **2d** in  $\text{CDCl}_3$

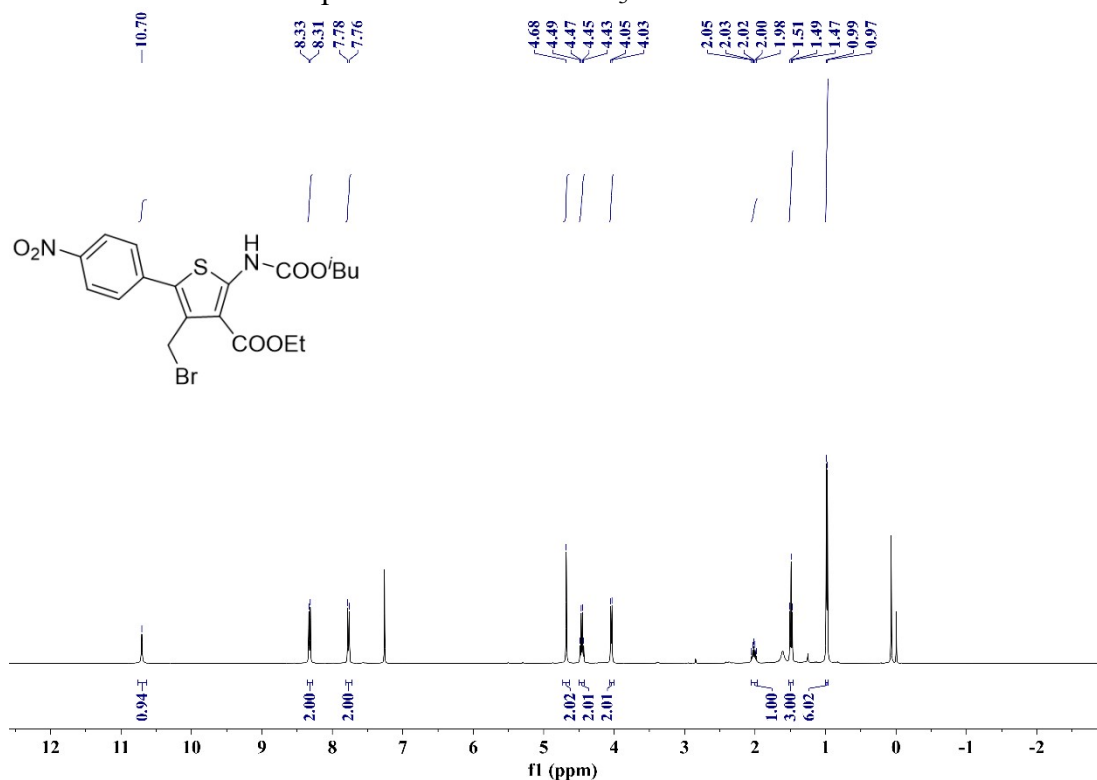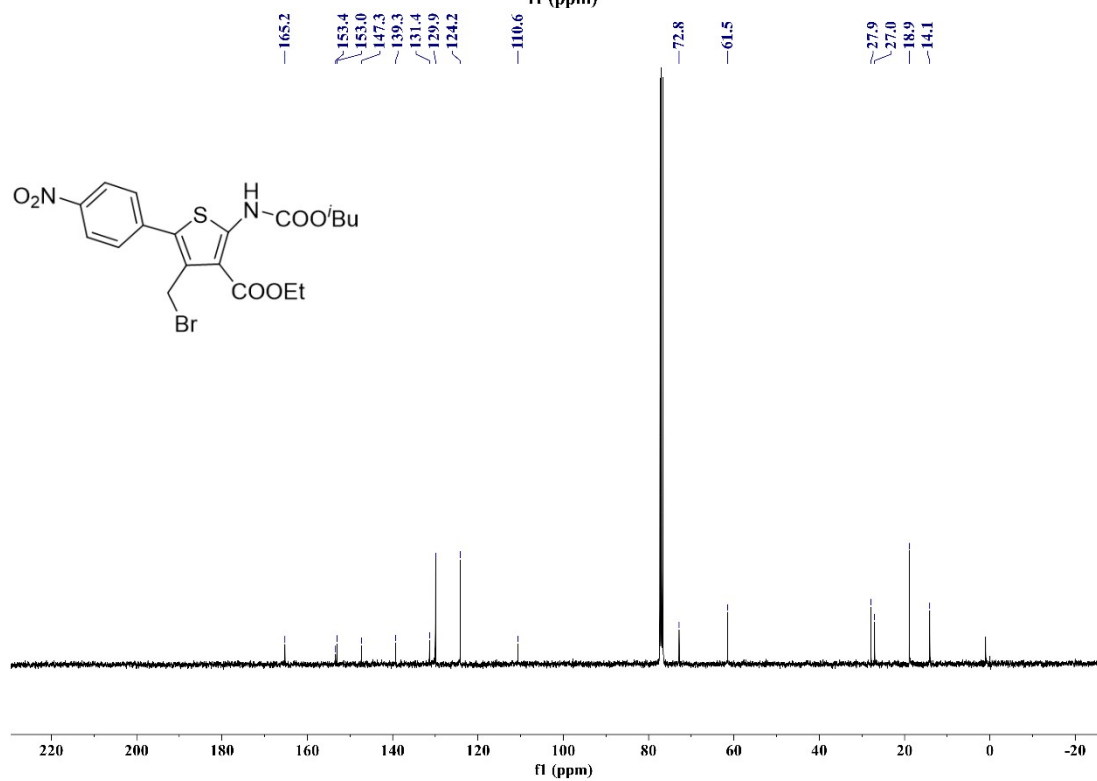

<sup>1</sup>H NMR and <sup>13</sup>C NMR Spectrum of **2e** in CDCl<sub>3</sub>

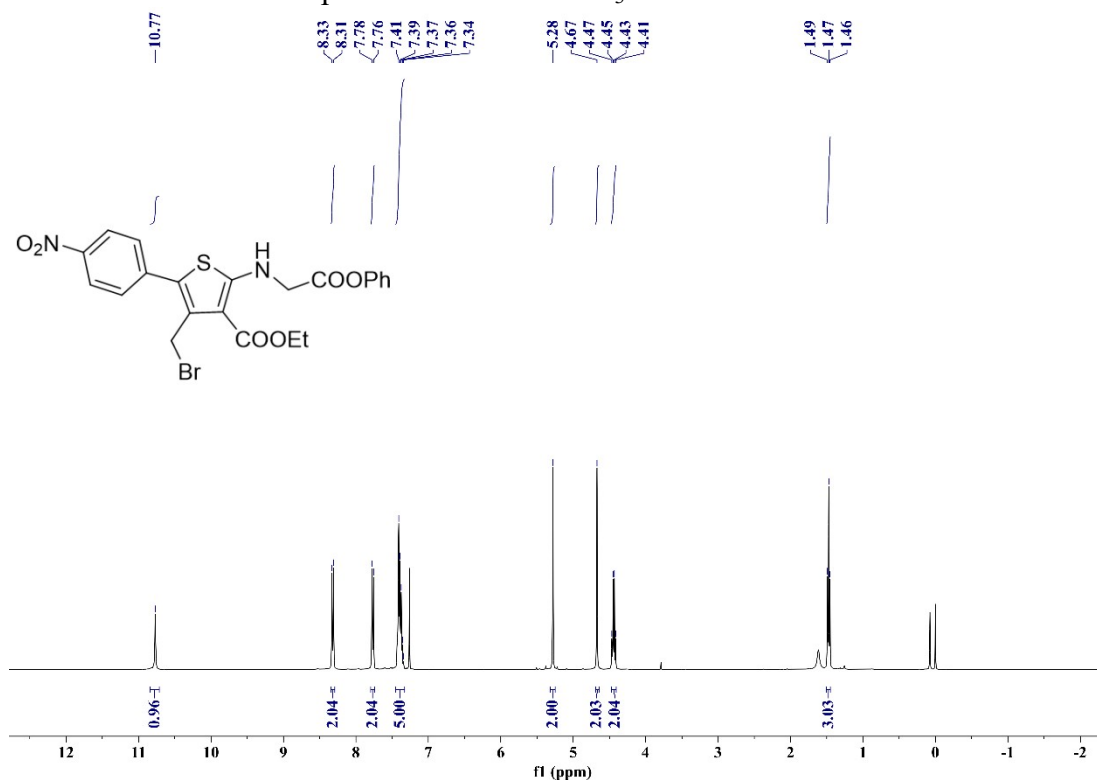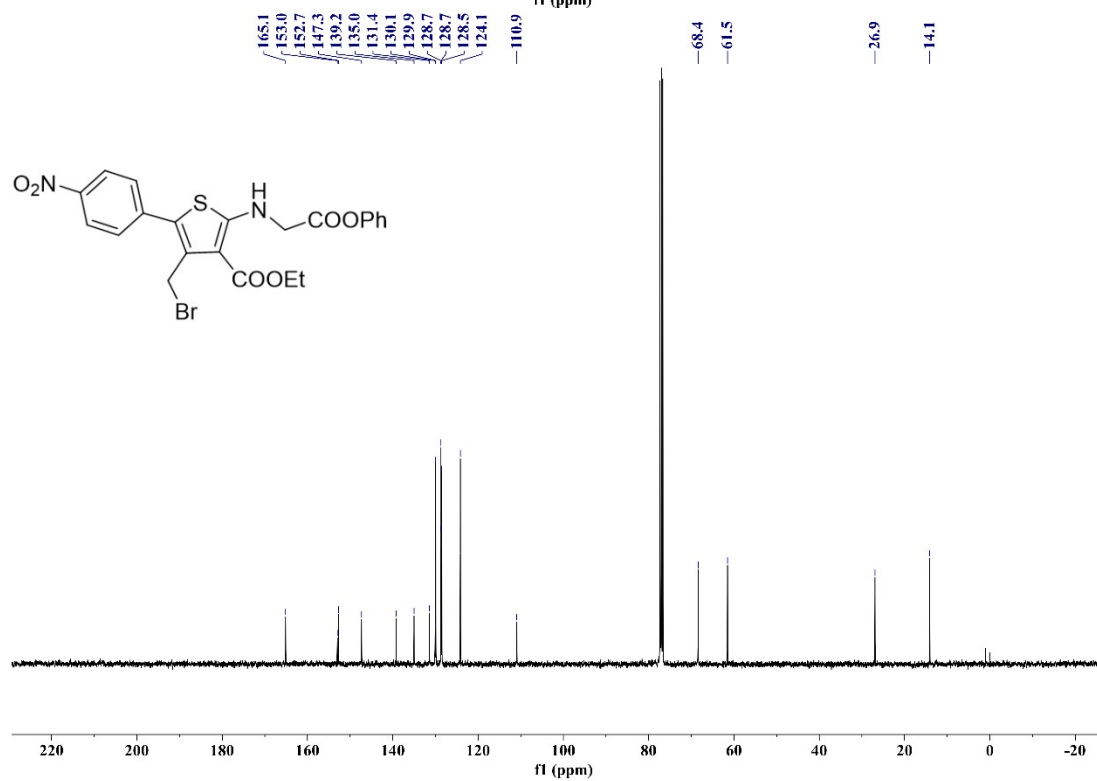

$^1\text{H}$ ,  $^{13}\text{C}$  and  $^{19}\text{F}$  NMR Spectrum of **2f** in  $\text{CDCl}_3$

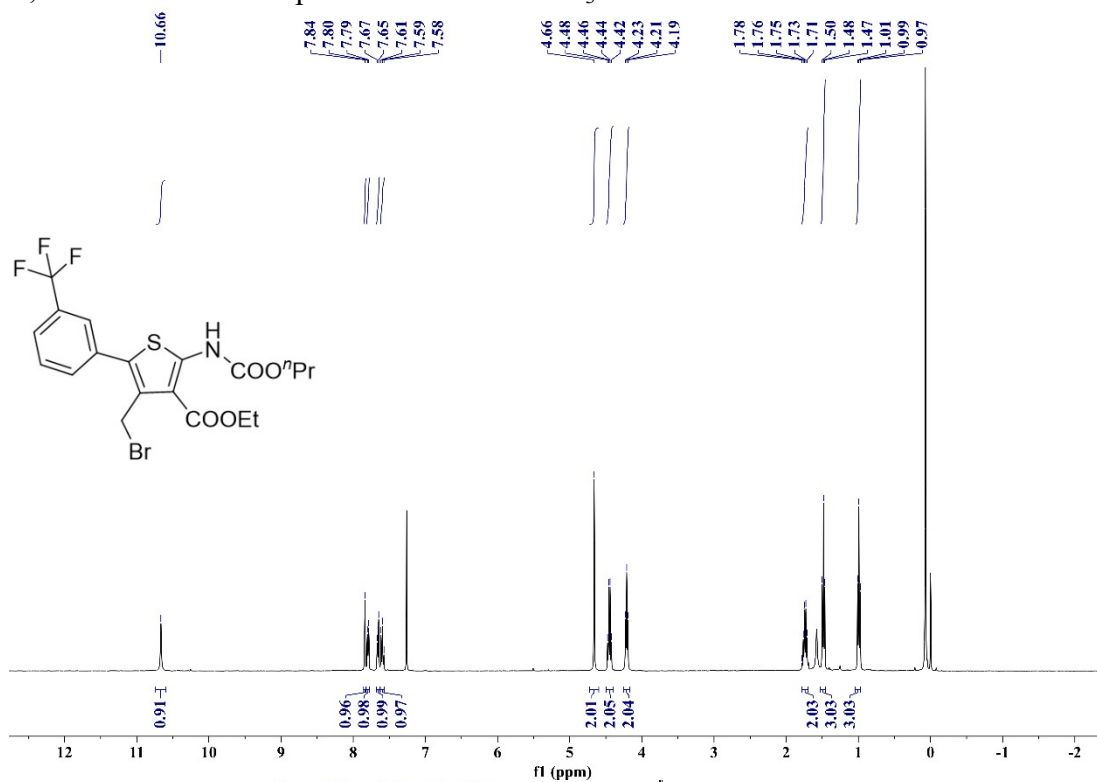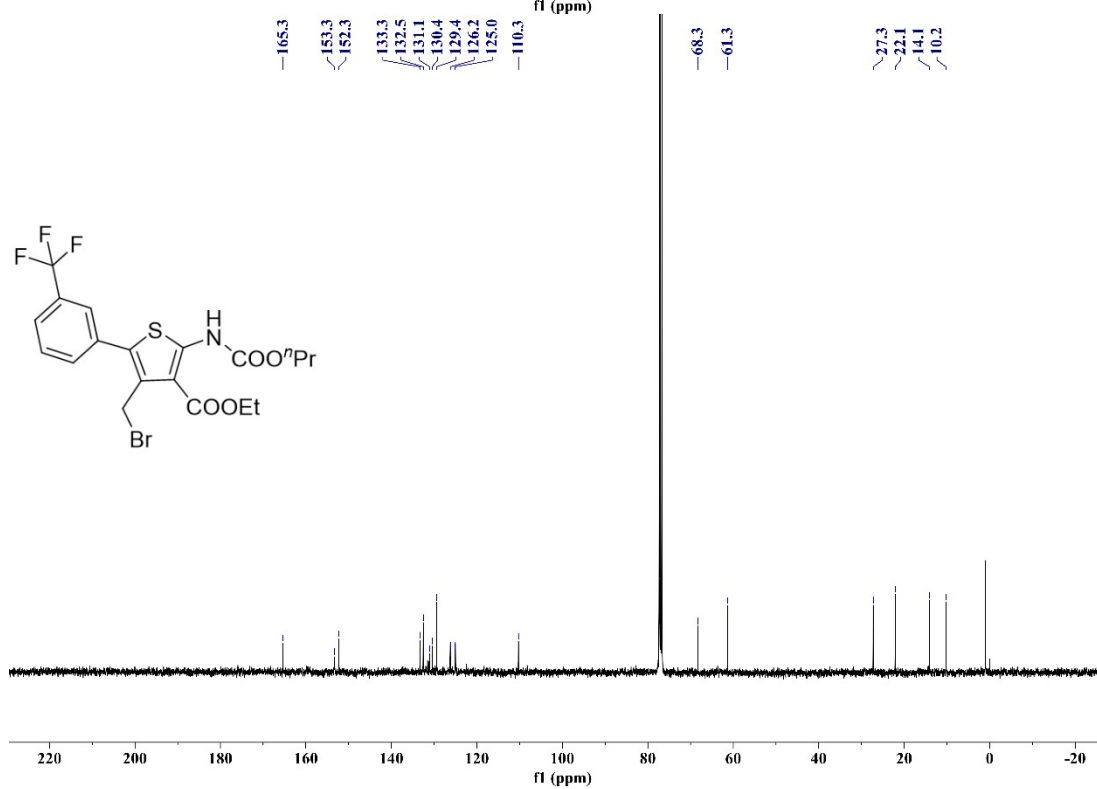



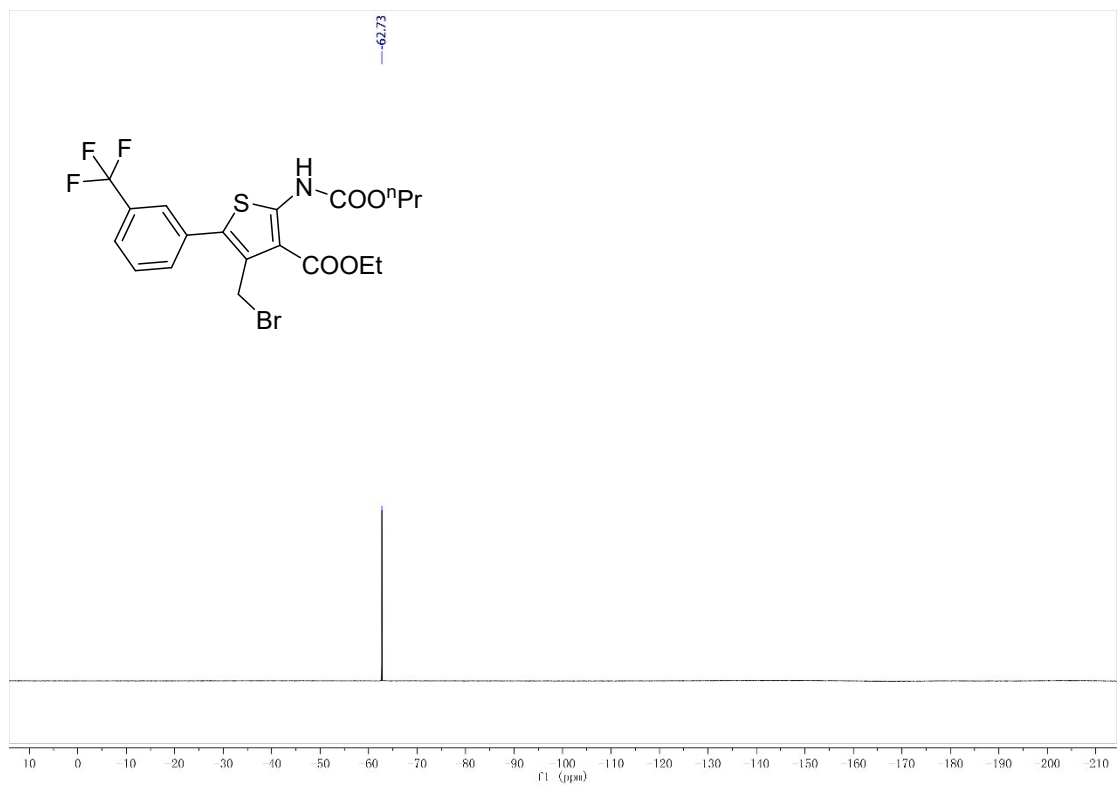

$^1\text{H}$ ,  $^{13}\text{C}$  and  $^{19}\text{F}$  NMR Spectrum of **2g** in  $\text{CDCl}_3$

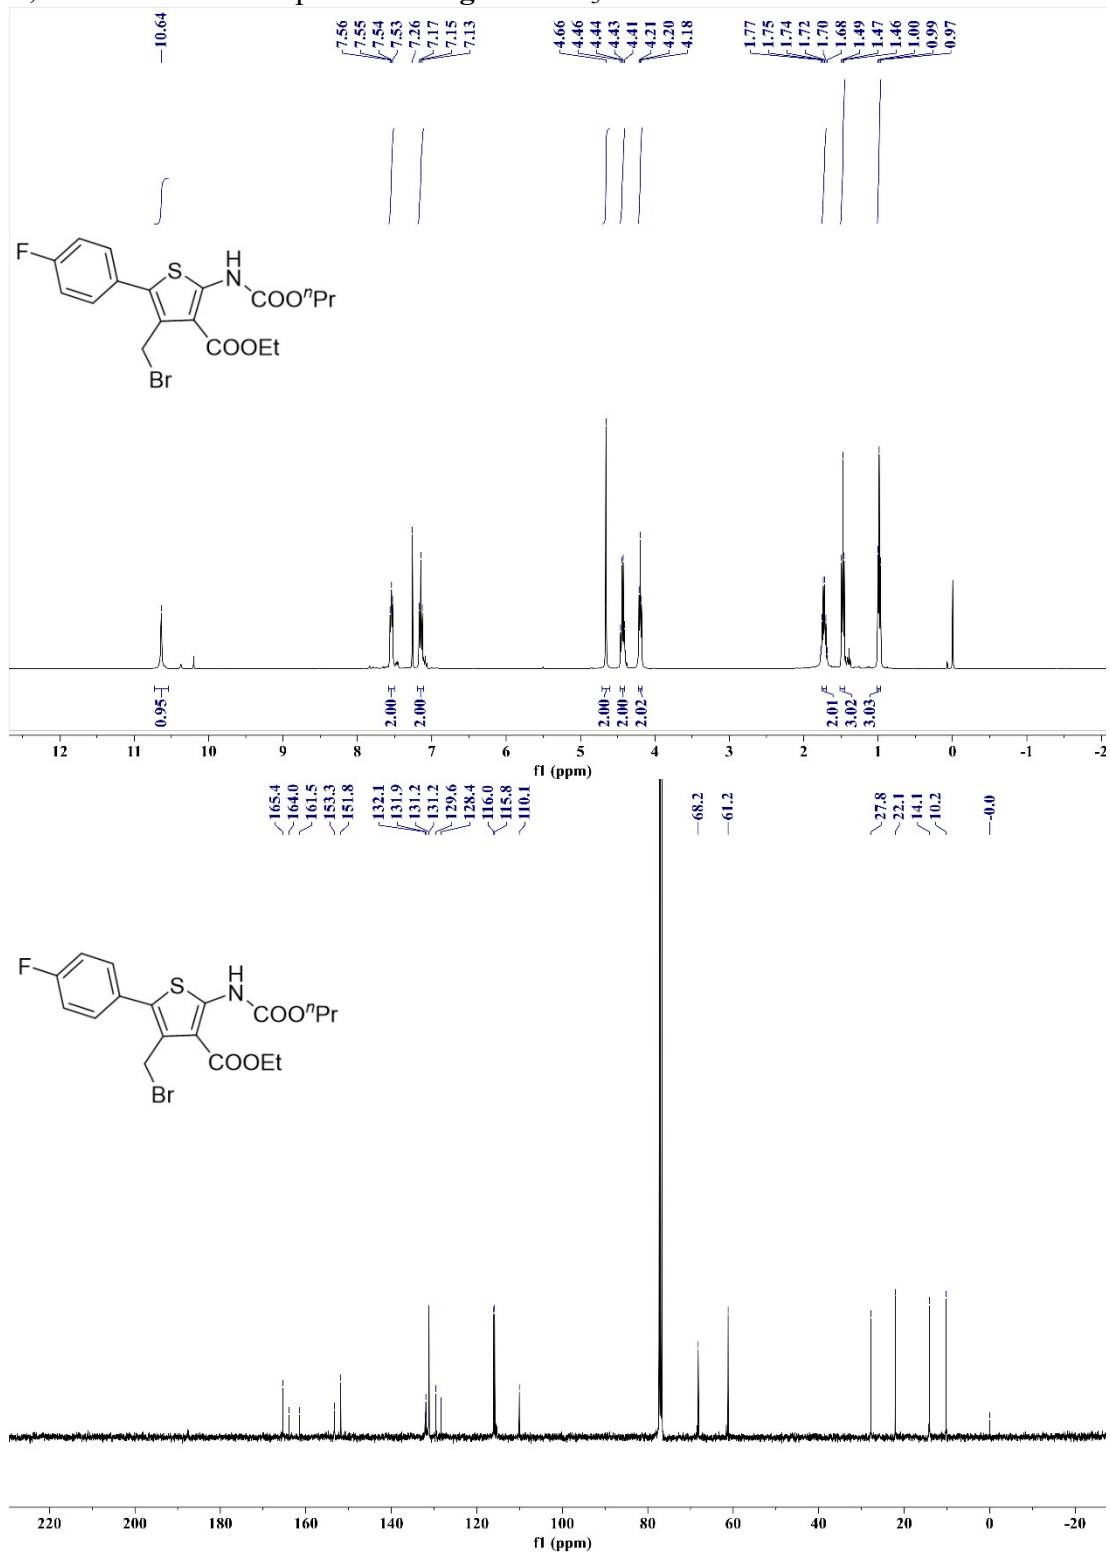

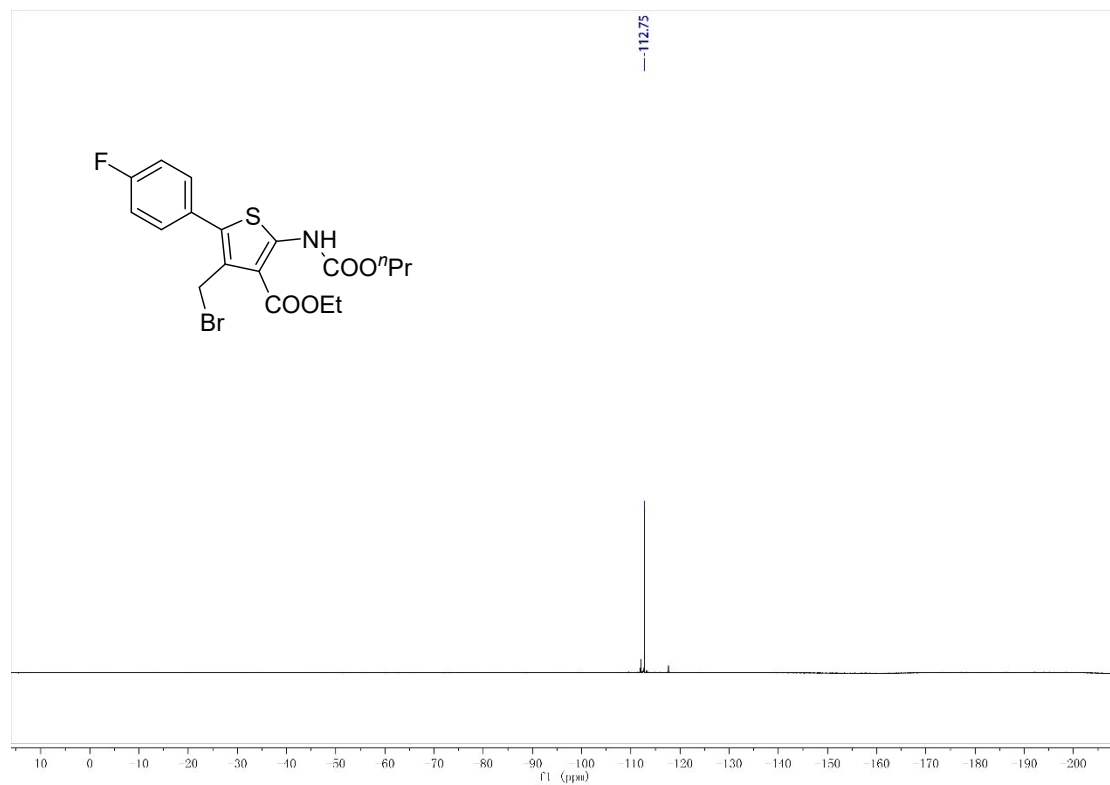

$^1\text{H}$  NMR and  $^{13}\text{C}$  NMR Spectrum of **2h** in  $\text{CDCl}_3$

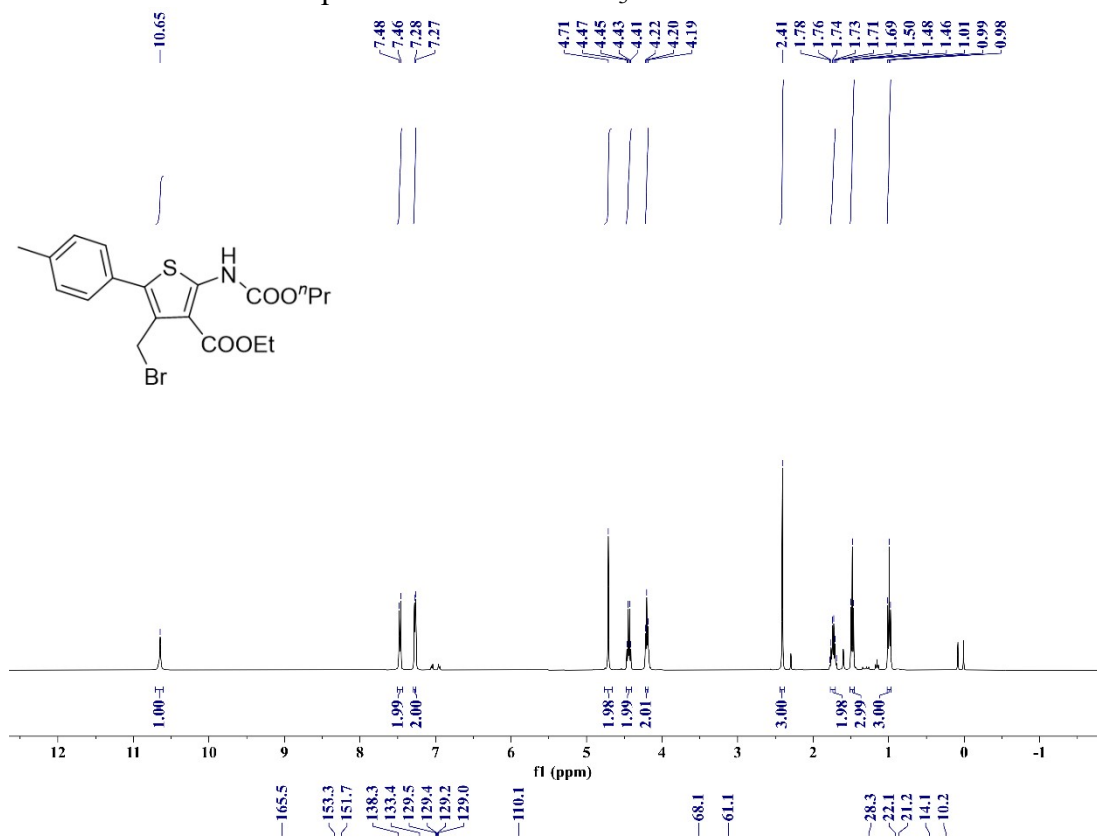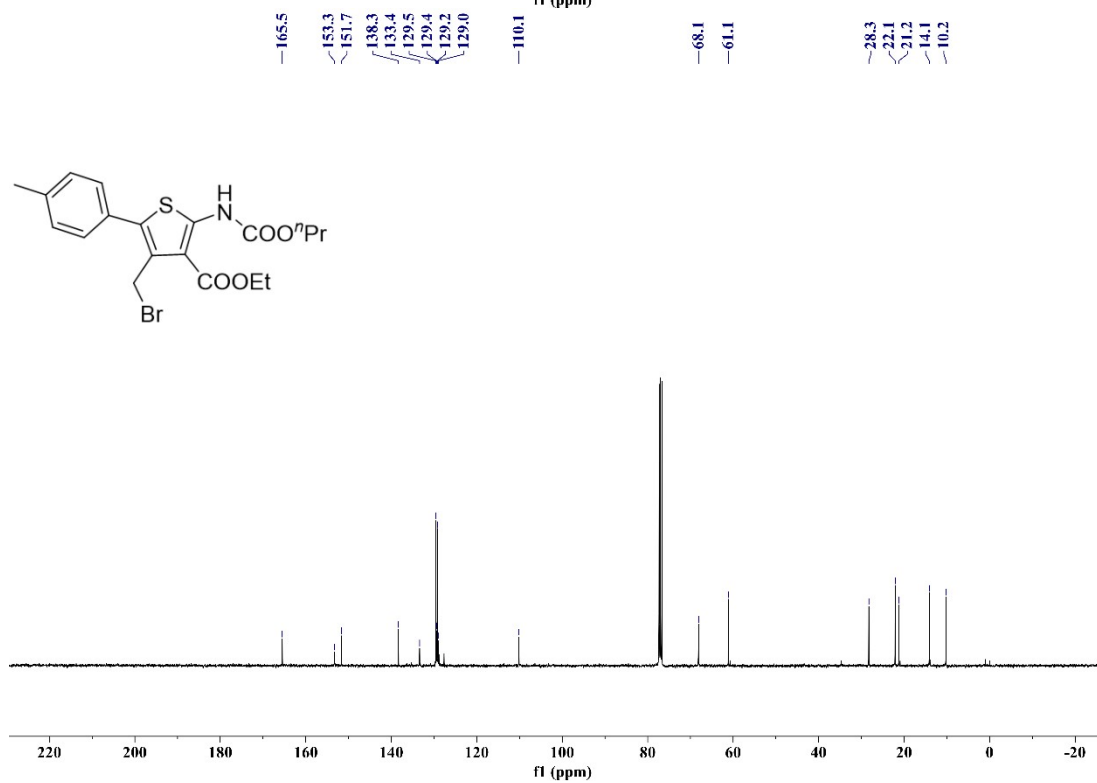

$^1\text{H}$  NMR and  $^{13}\text{C}$  NMR Spectrum of **2i** in  $\text{CDCl}_3$

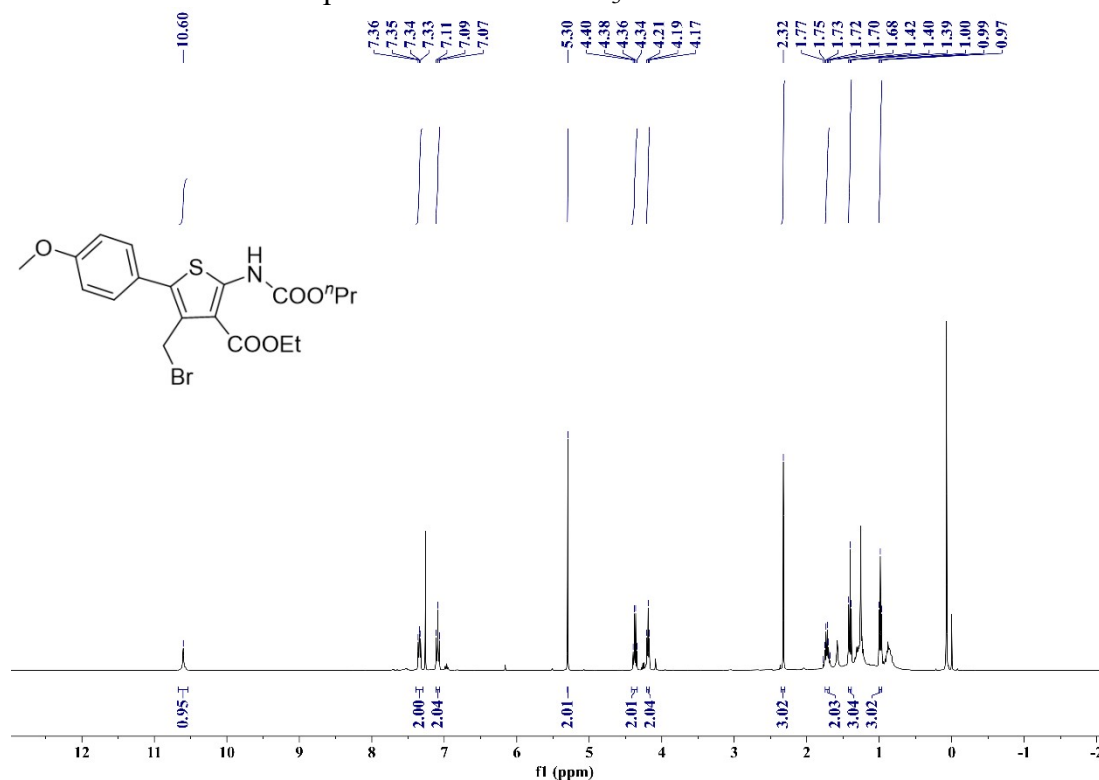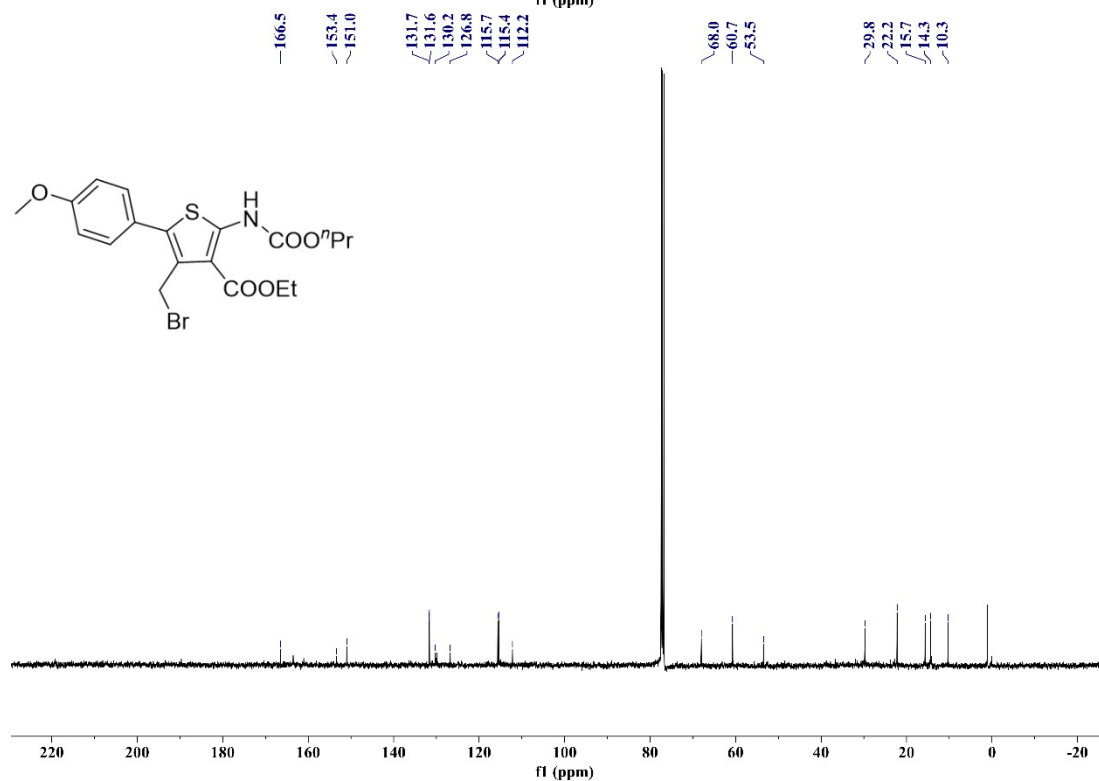

<sup>1</sup>H NMR and <sup>13</sup>C NMR Spectrum of **2j** in CDCl<sub>3</sub>

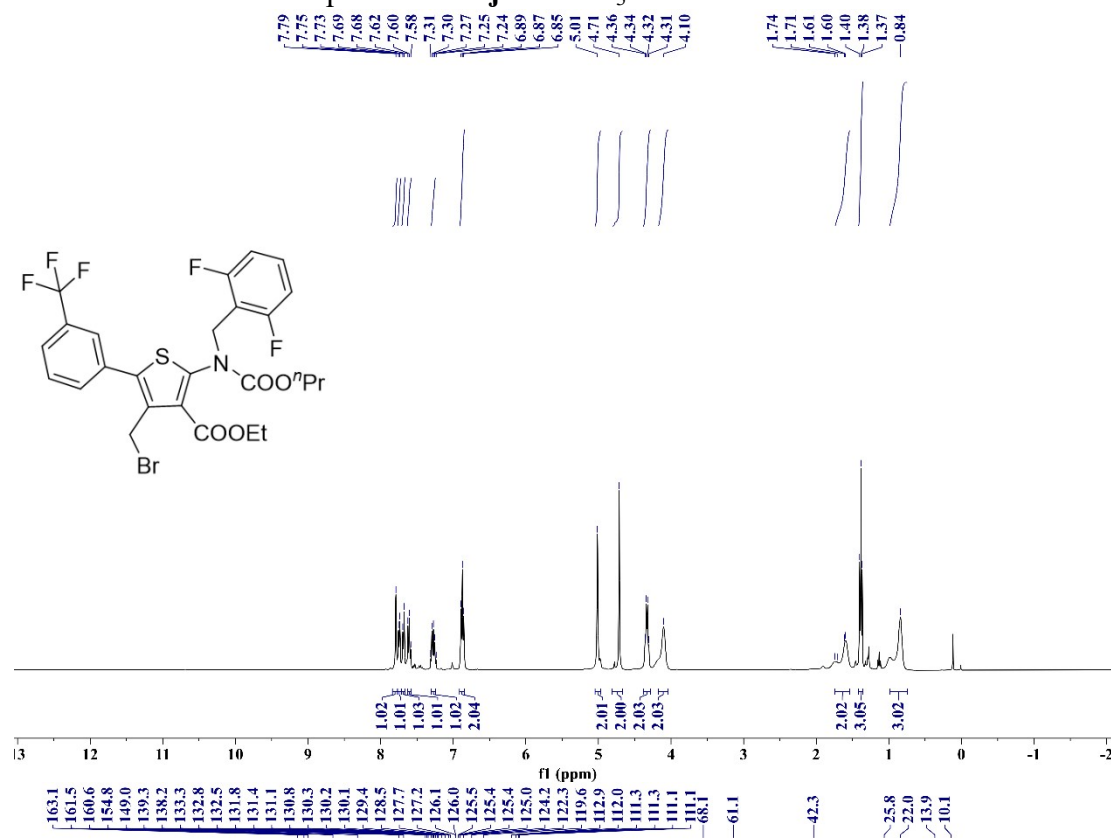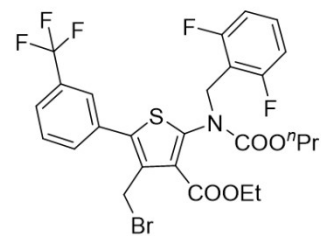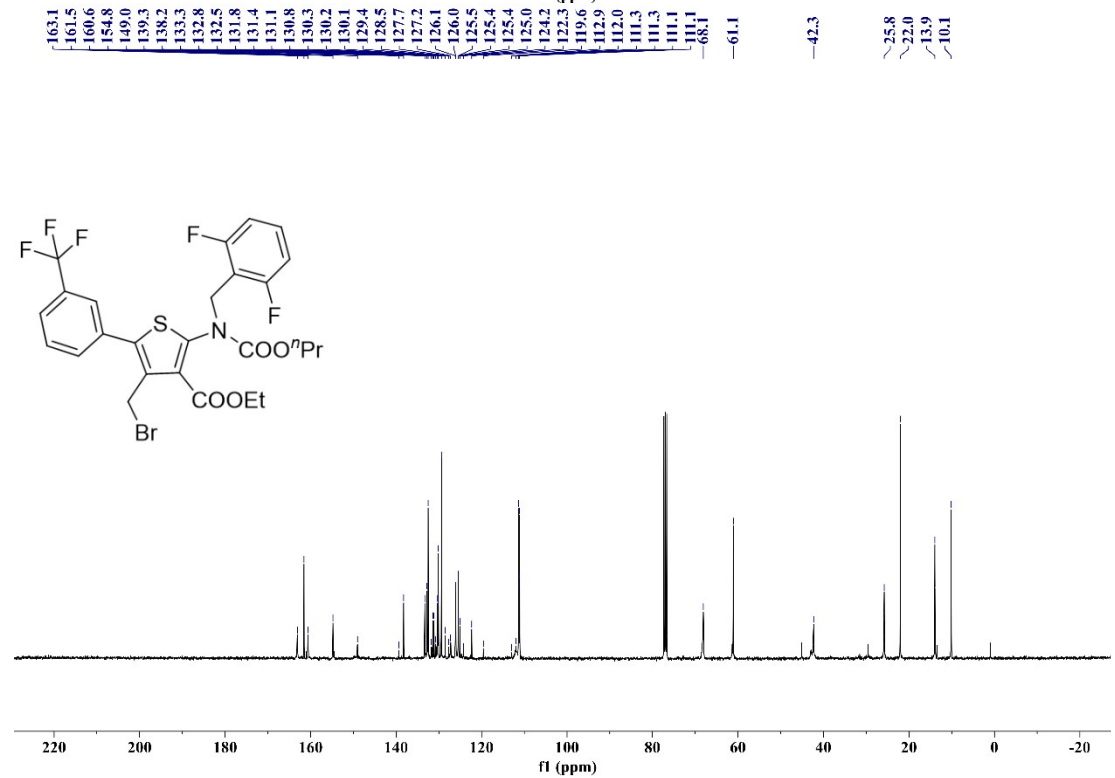

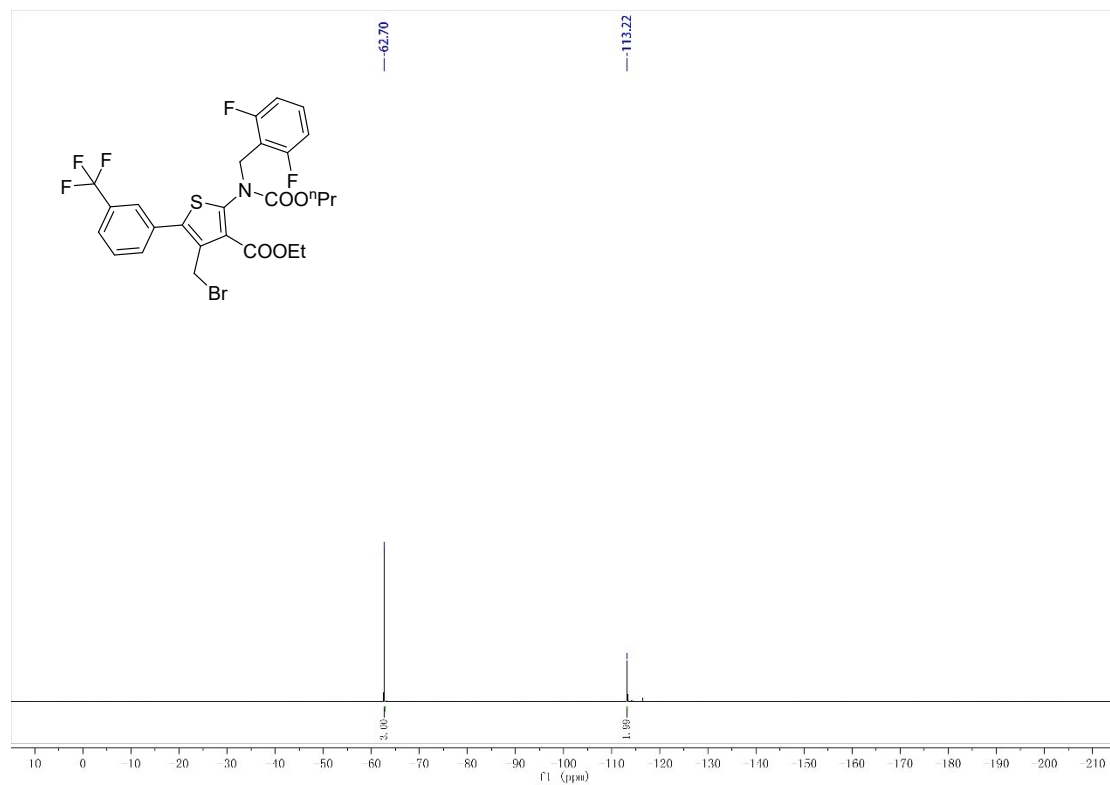

<sup>1</sup>H NMR and <sup>13</sup>C NMR Spectrum of **2k** in CDCl<sub>3</sub>

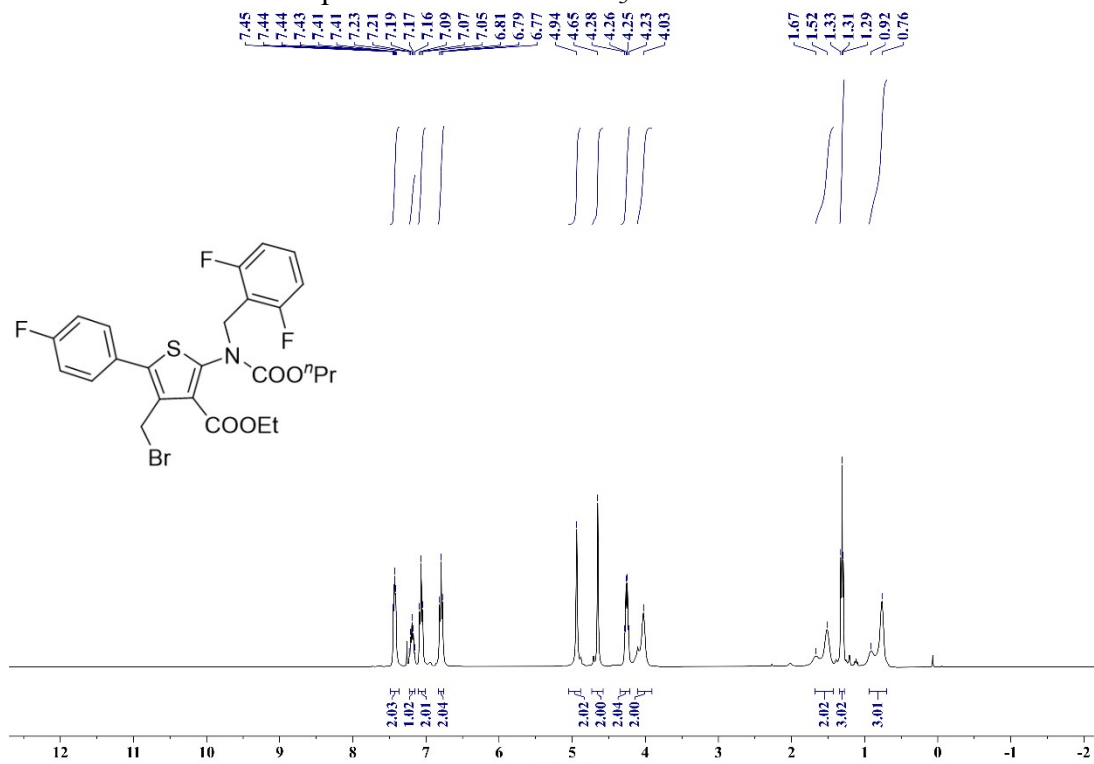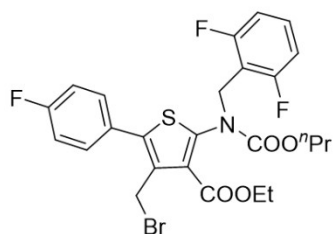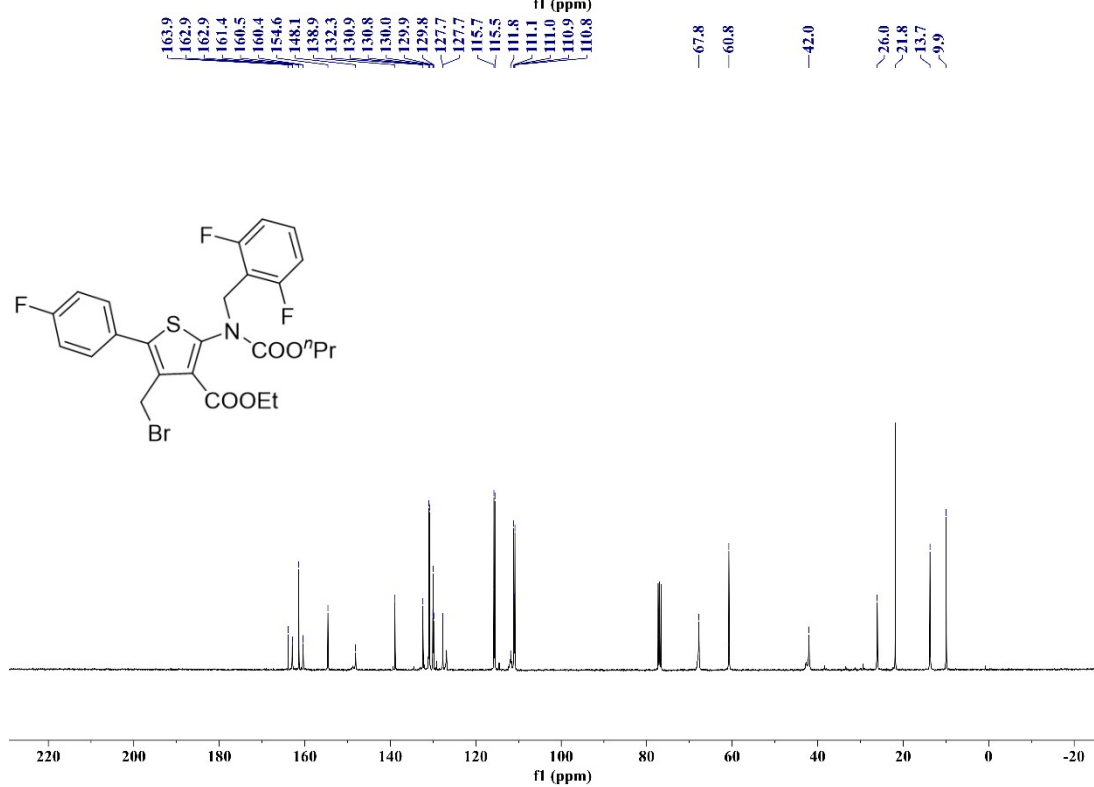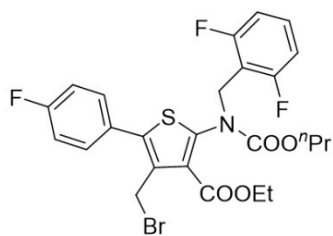



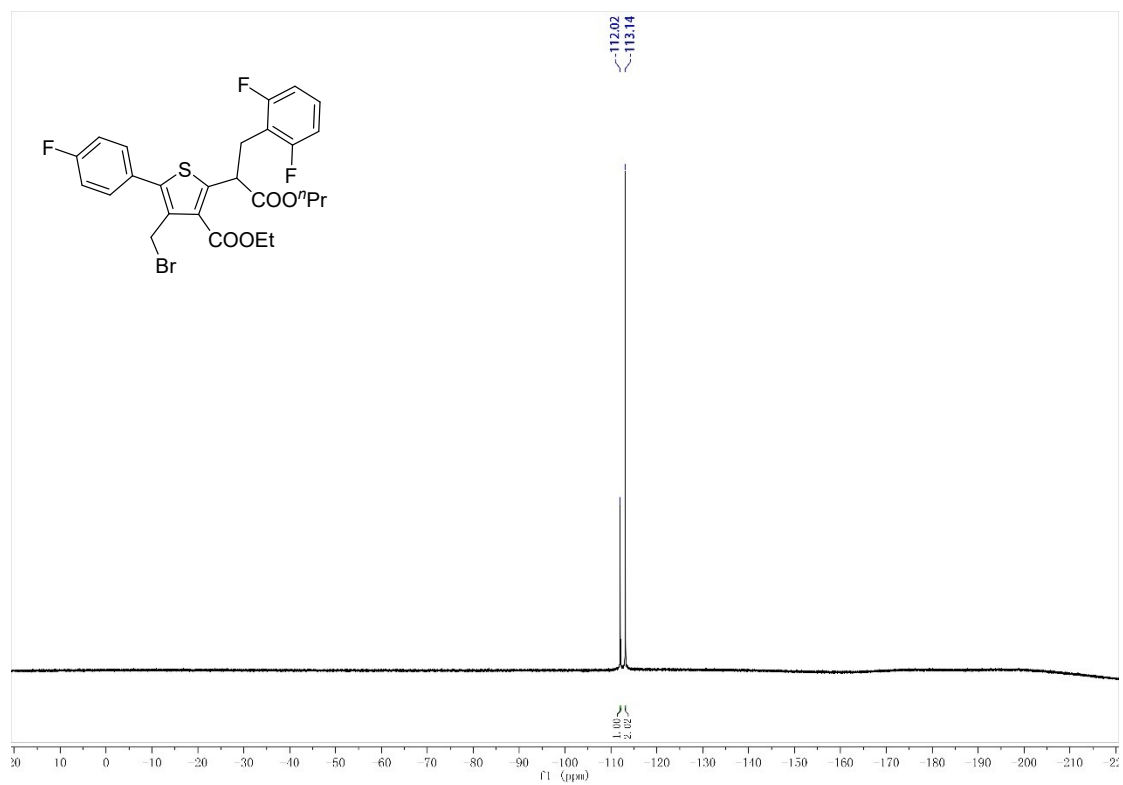

$^1\text{H}$ ,  $^{13}\text{C}$  and  $^{19}\text{F}$  NMR Spectrum of **21** in  $\text{CDCl}_3$

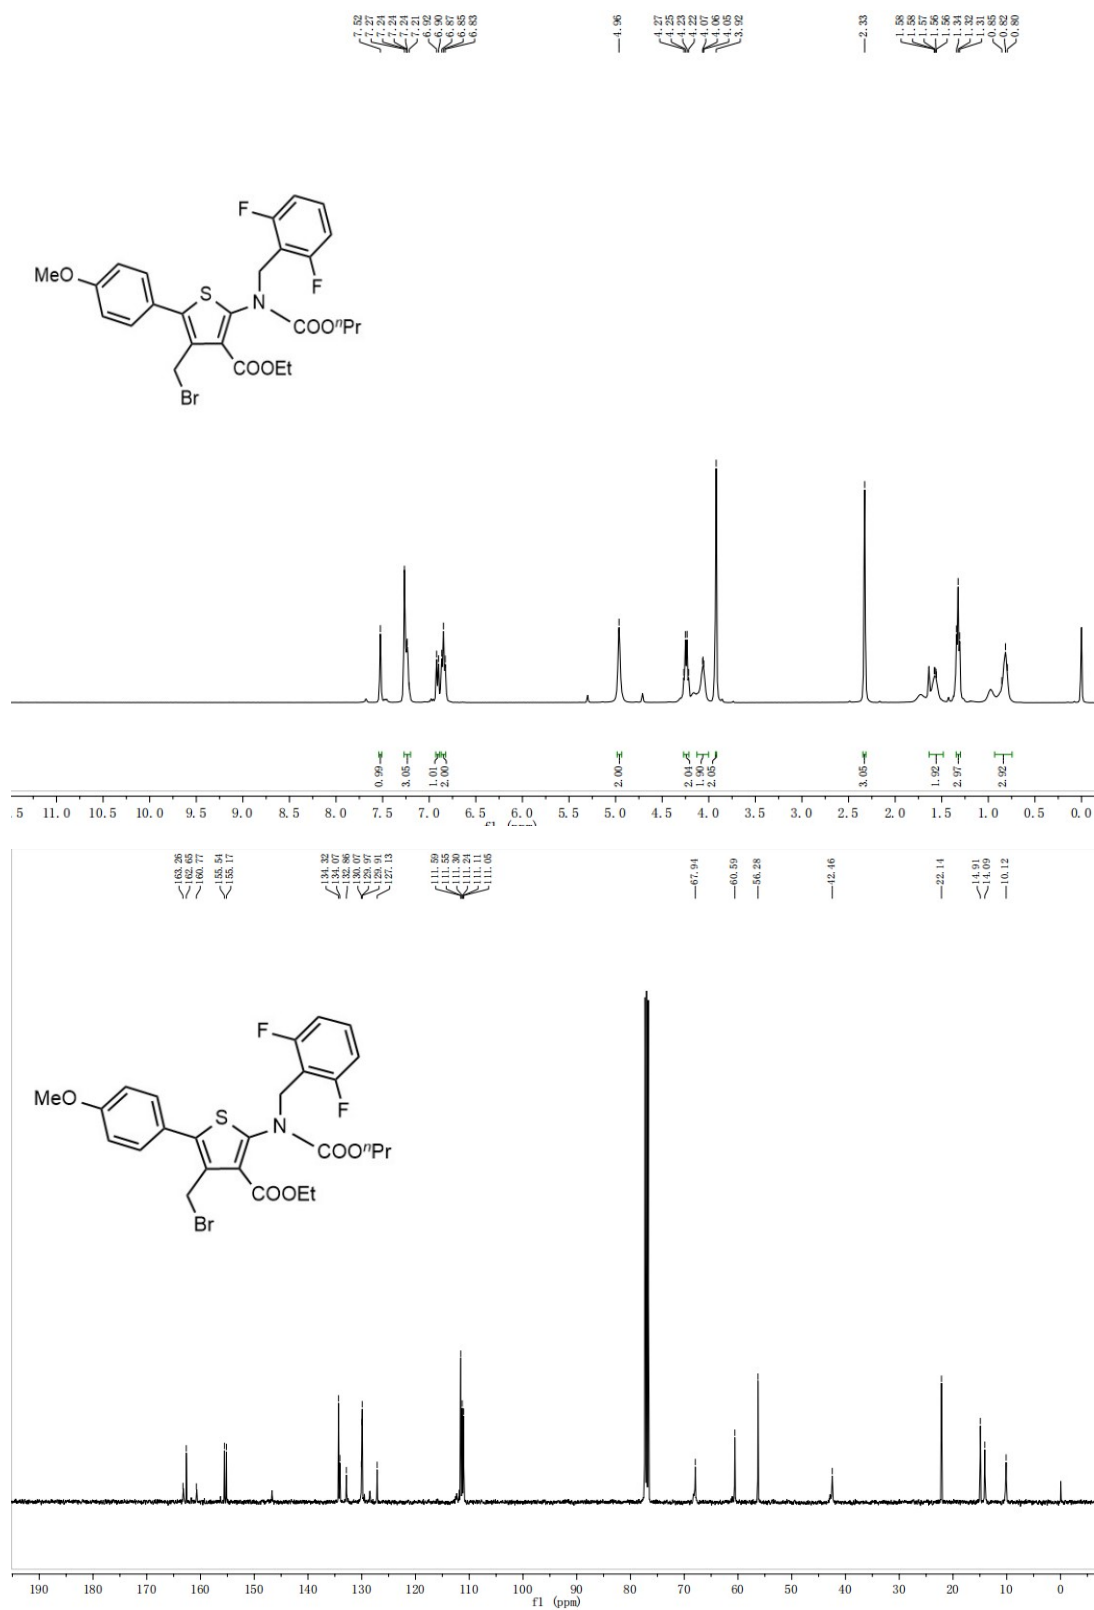

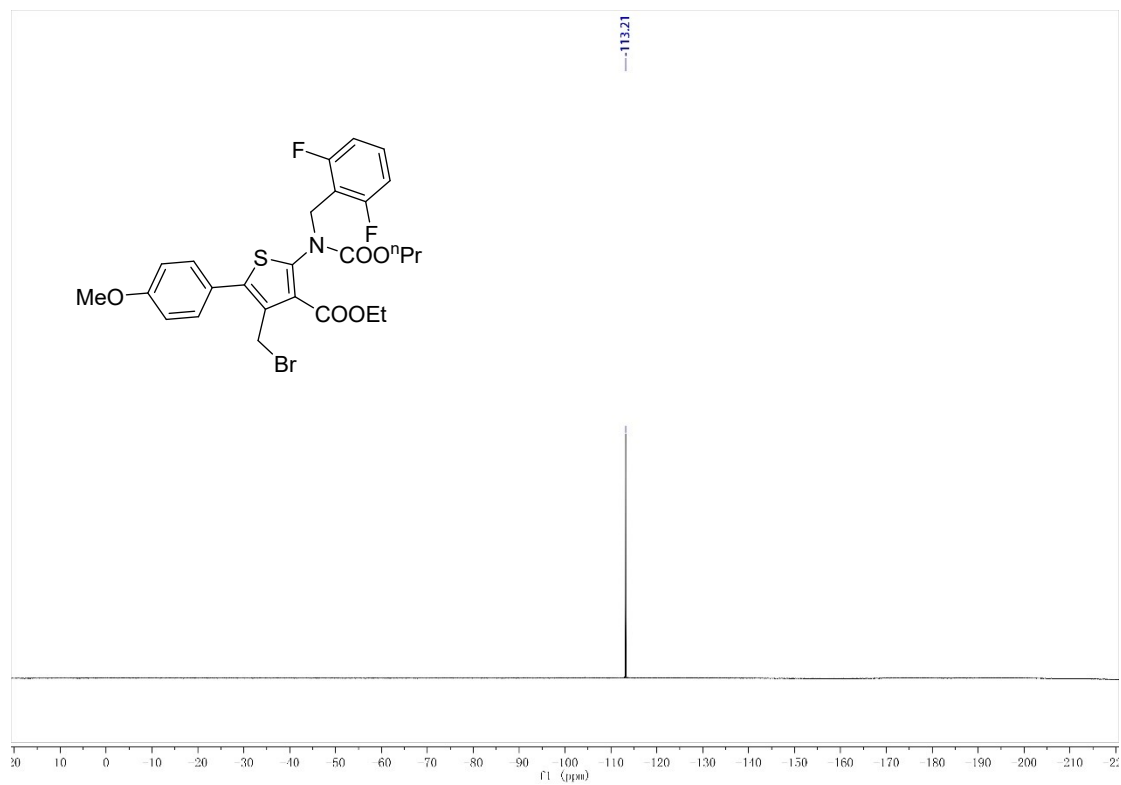

<sup>1</sup>H NMR and <sup>13</sup>C NMR Spectrum of **2m** in CDCl<sub>3</sub>

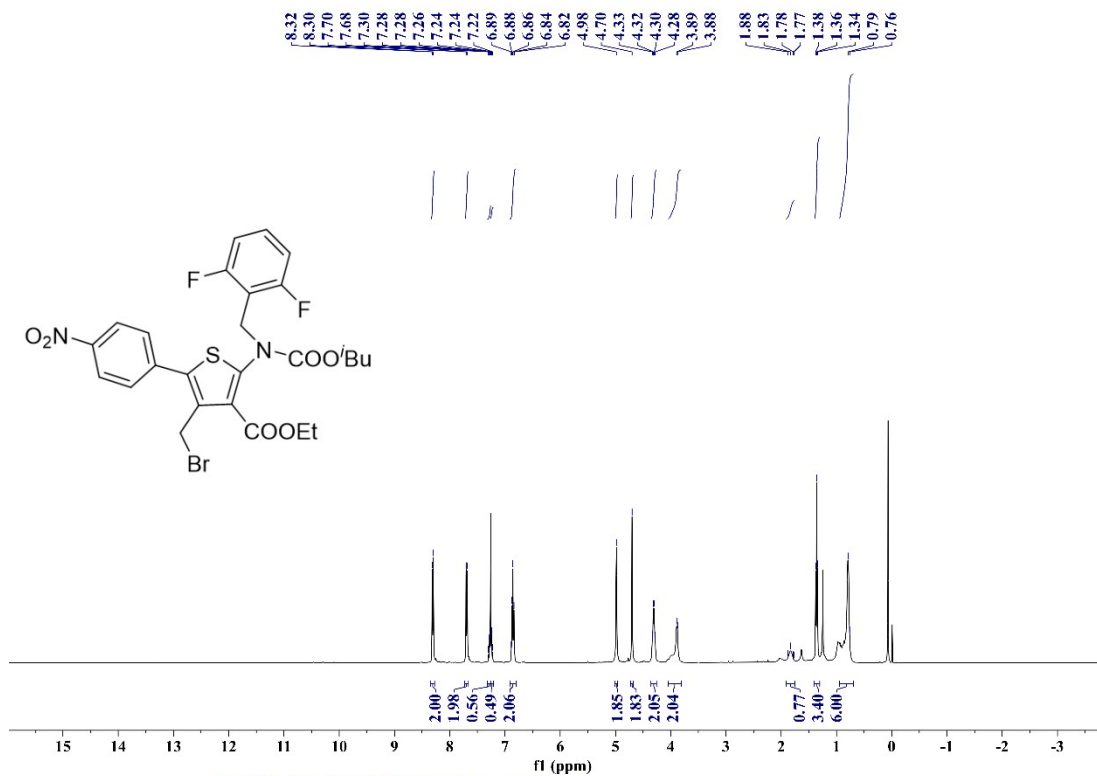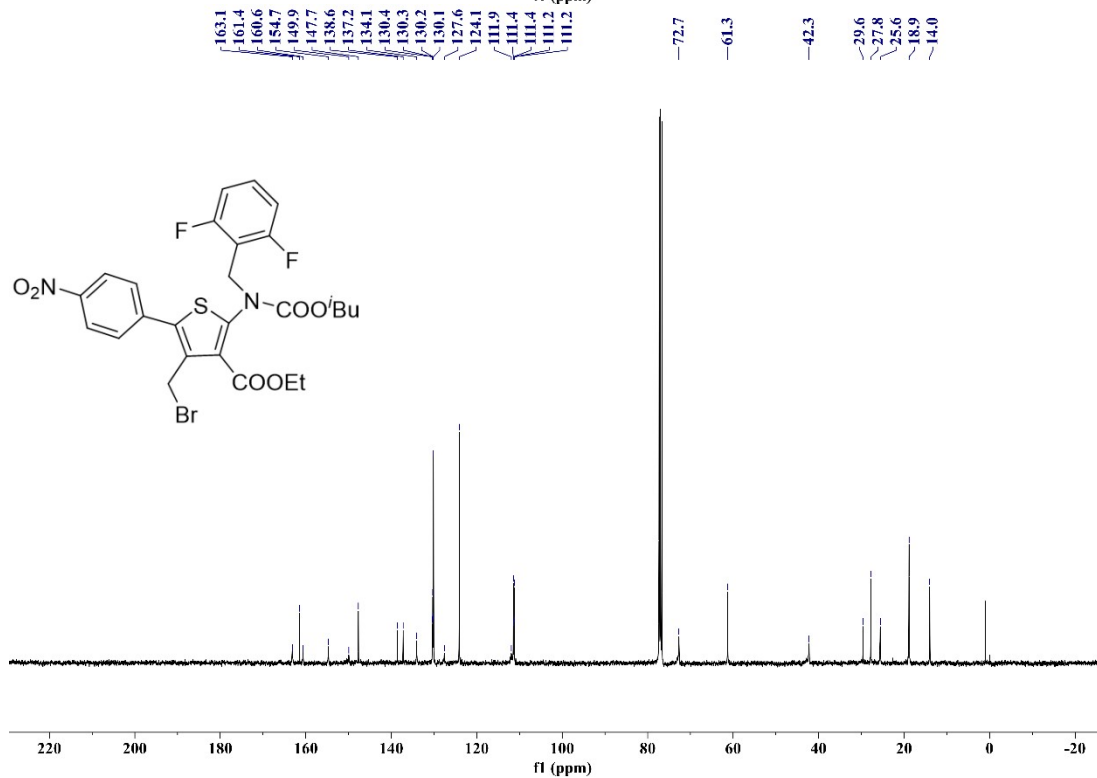

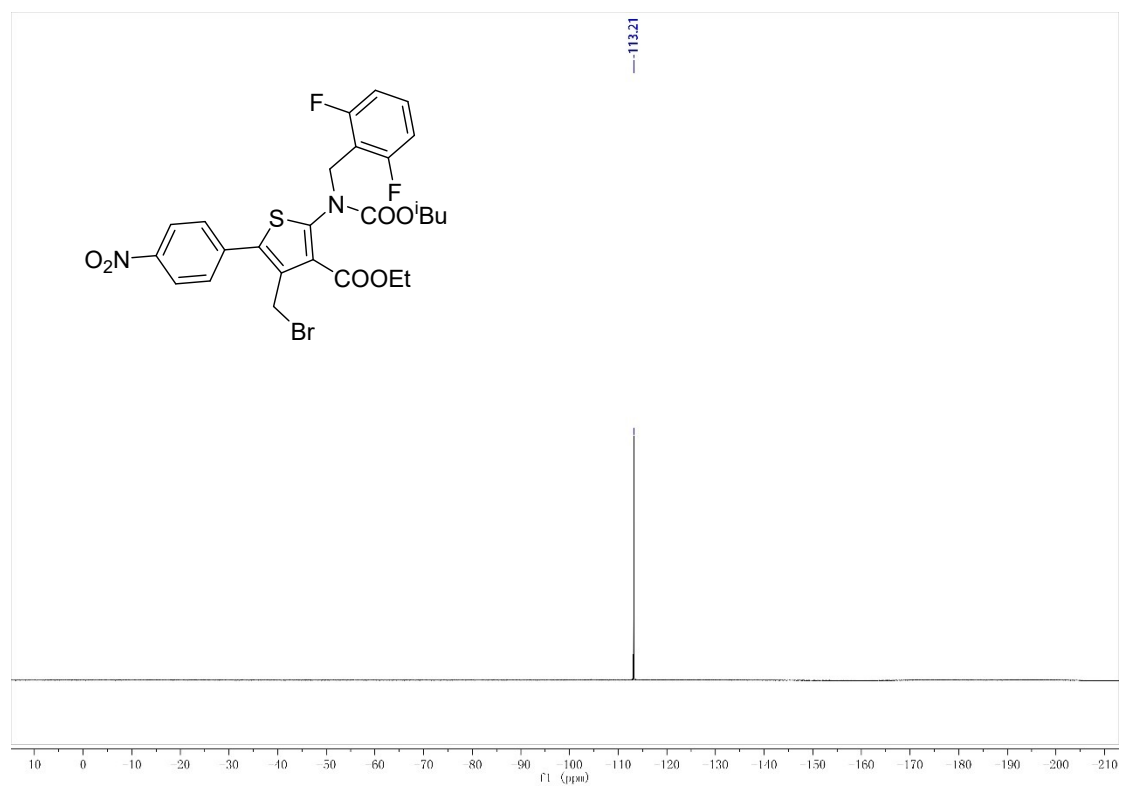

<sup>1</sup>H NMR and <sup>13</sup>C NMR Spectrum of **2n** in CDCl<sub>3</sub>

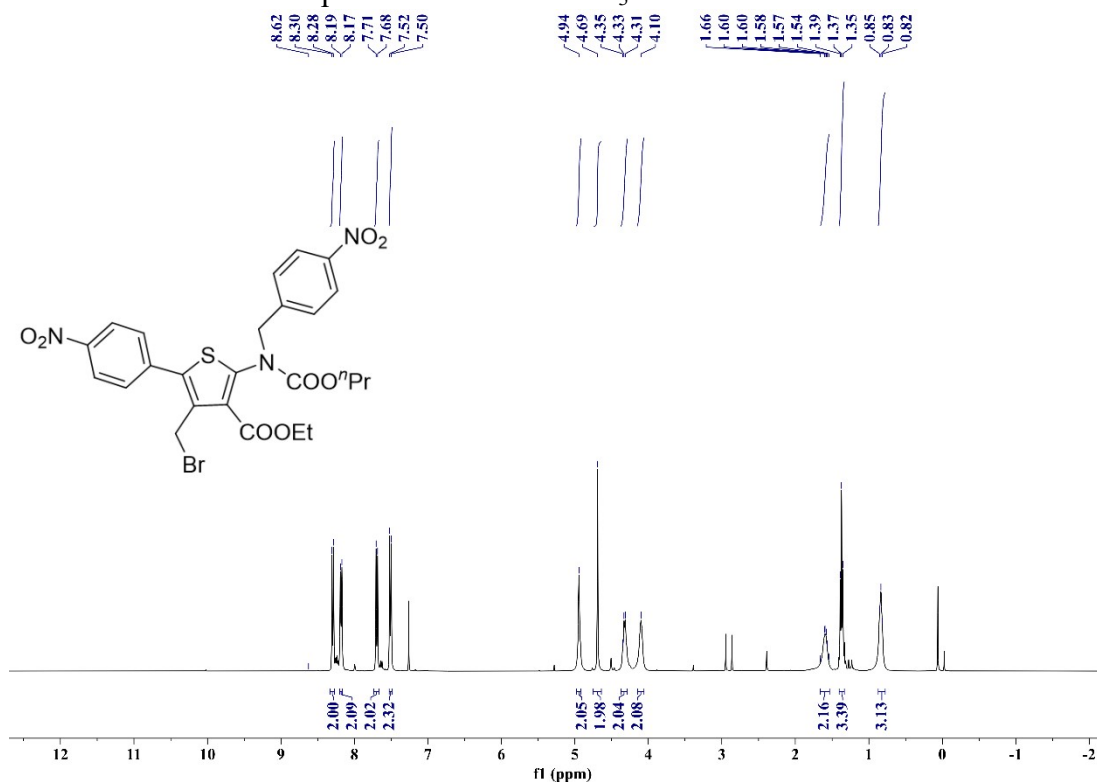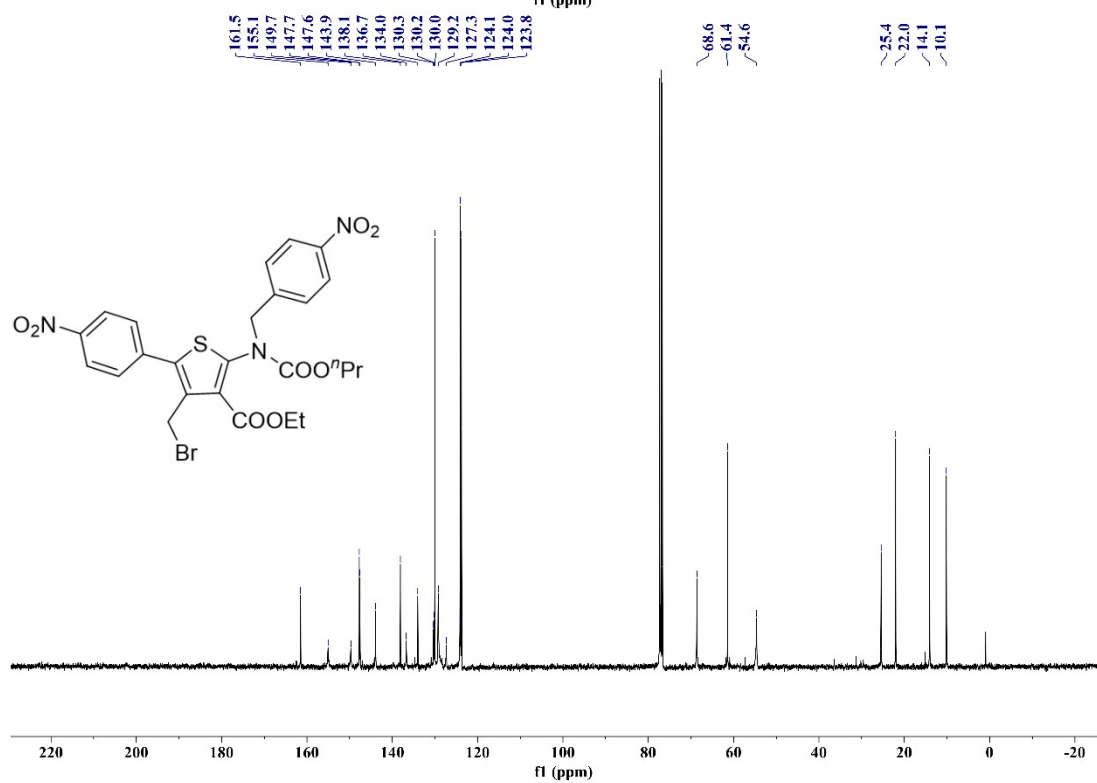

<sup>1</sup>H NMR and <sup>13</sup>C NMR Spectrum of **2p** in CDCl<sub>3</sub>

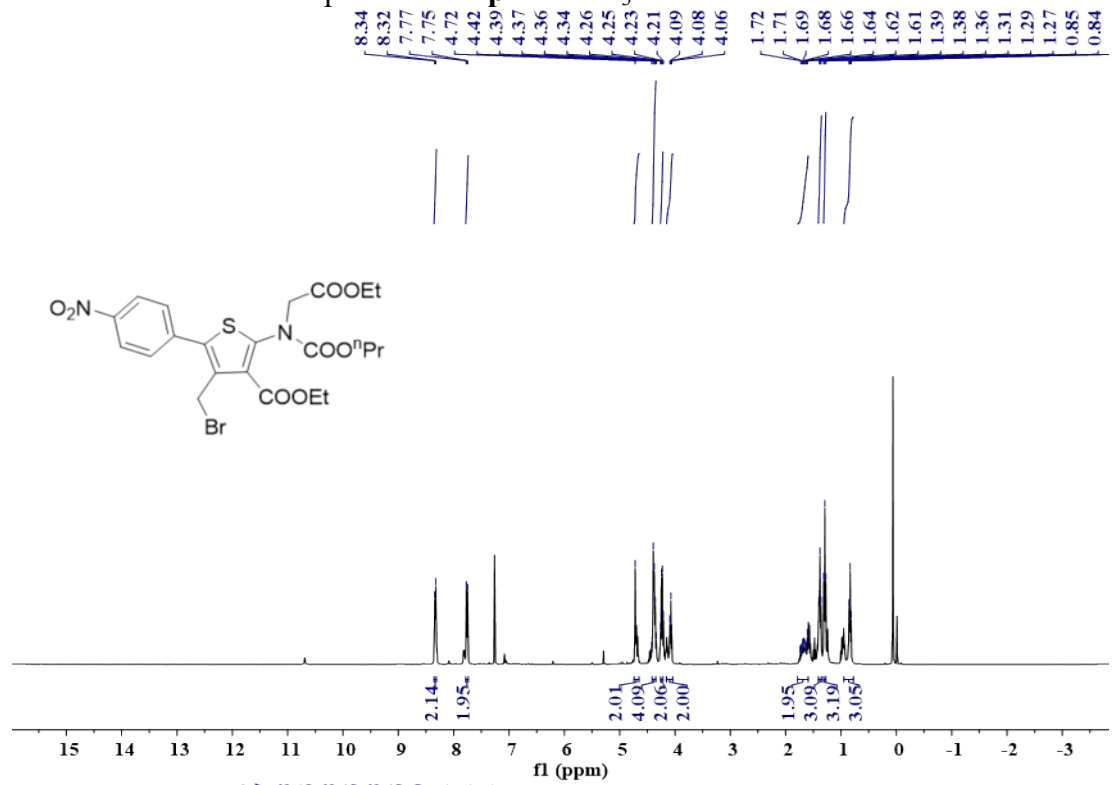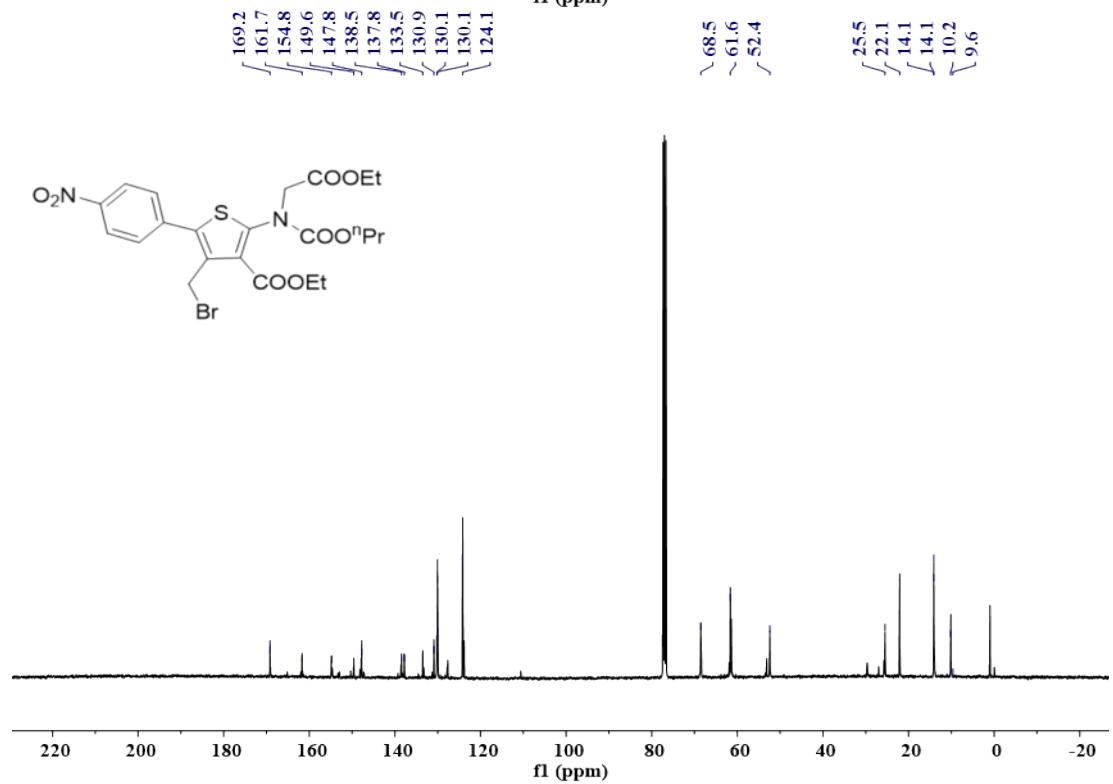

$^1\text{H}$  NMR and  $^{13}\text{C}$  NMR Spectrum of **2q** in  $\text{CDCl}_3$

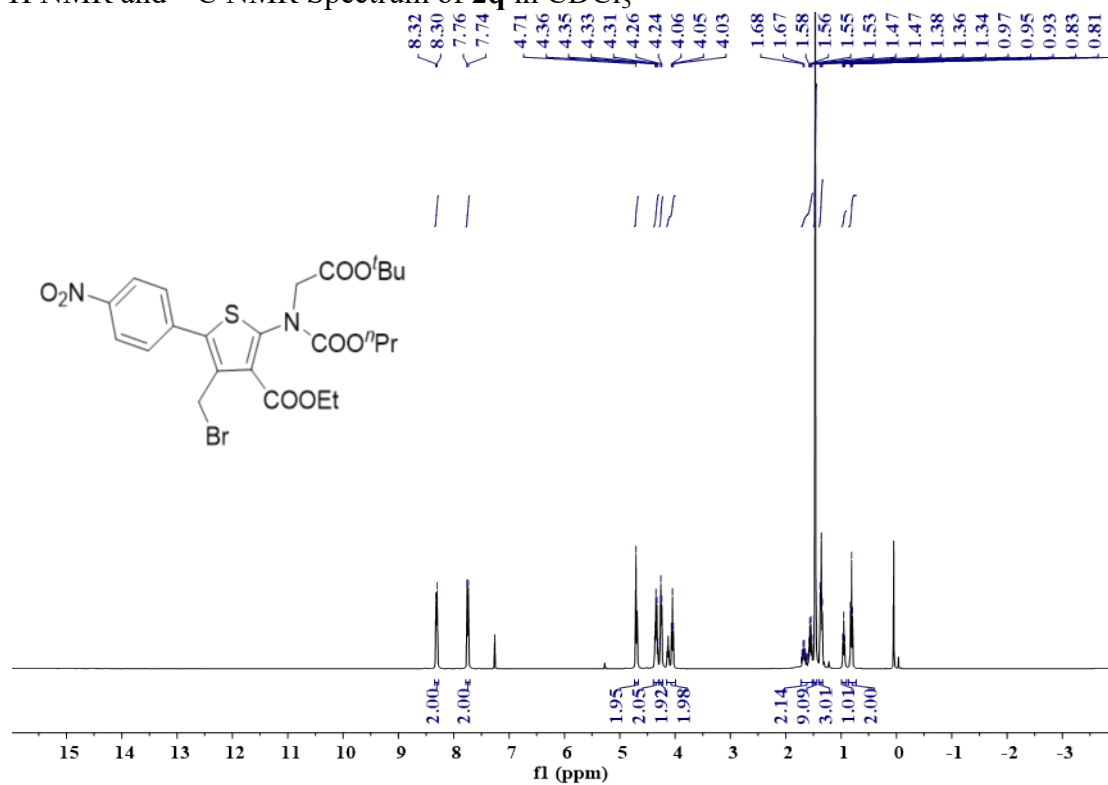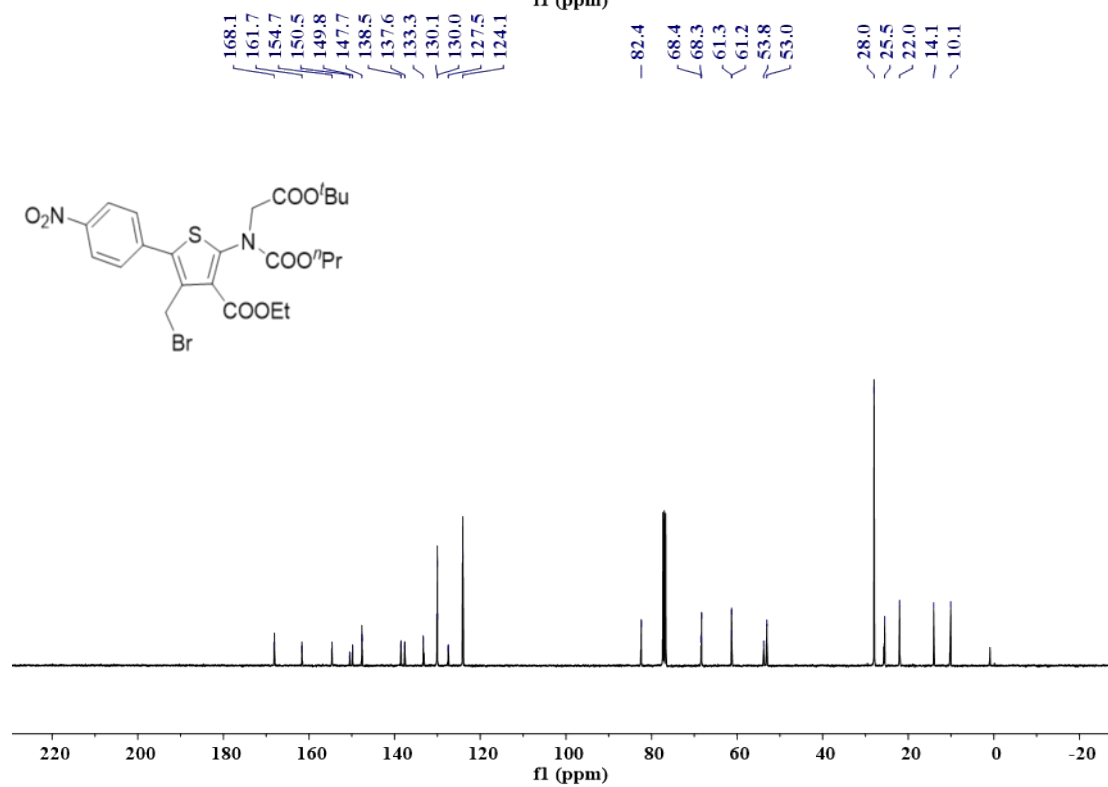



<sup>1</sup>H NMR and <sup>13</sup>C NMR Spectrum of **2r** in CDCl<sub>3</sub>

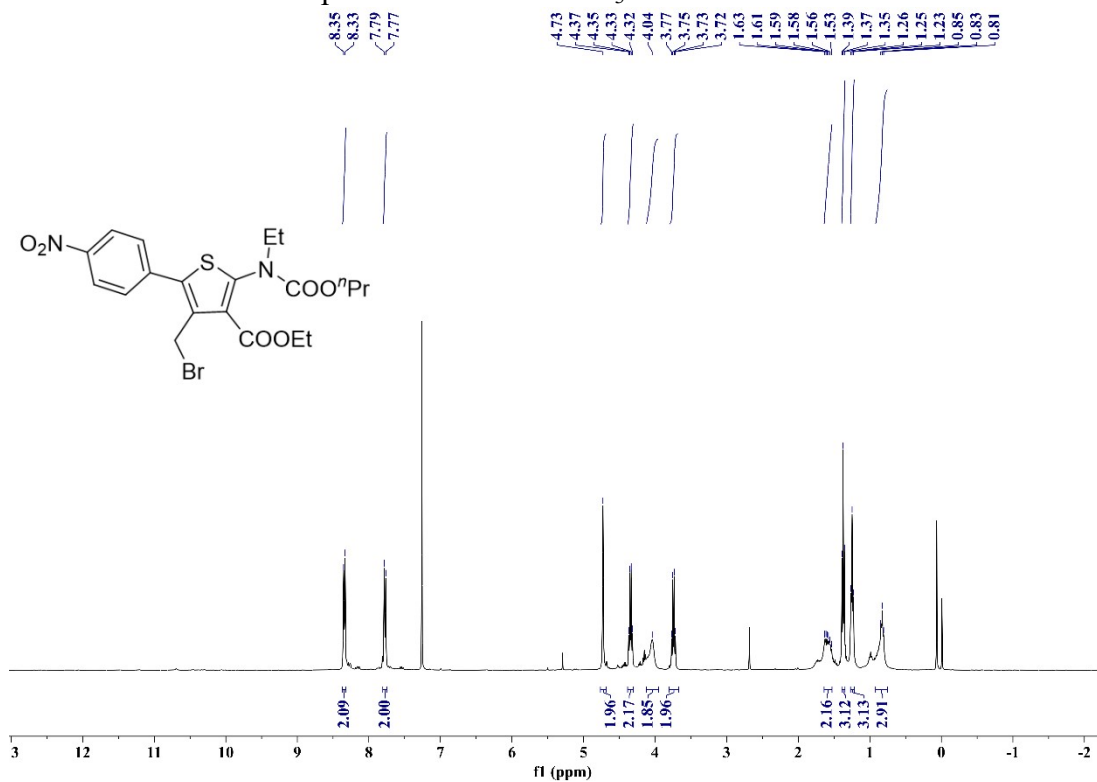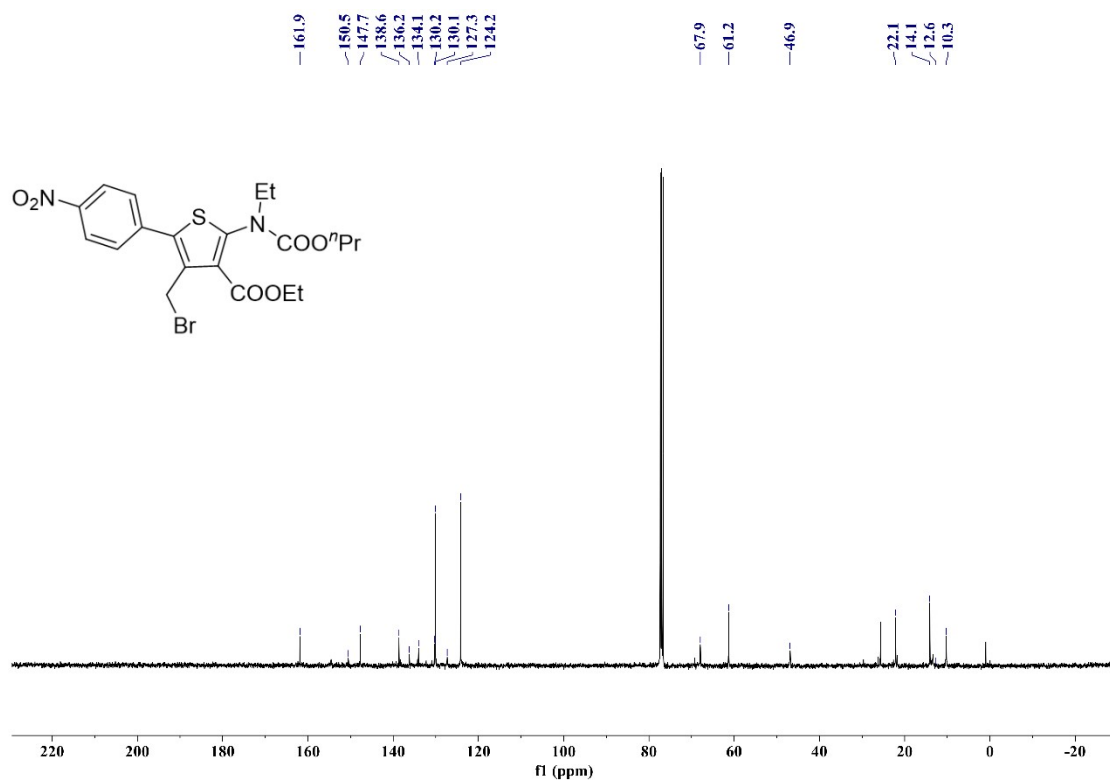

$^1\text{H}$  and  $^{19}\text{F}$  NMR Spectrum of **3a** in  $\text{CDCl}_3$

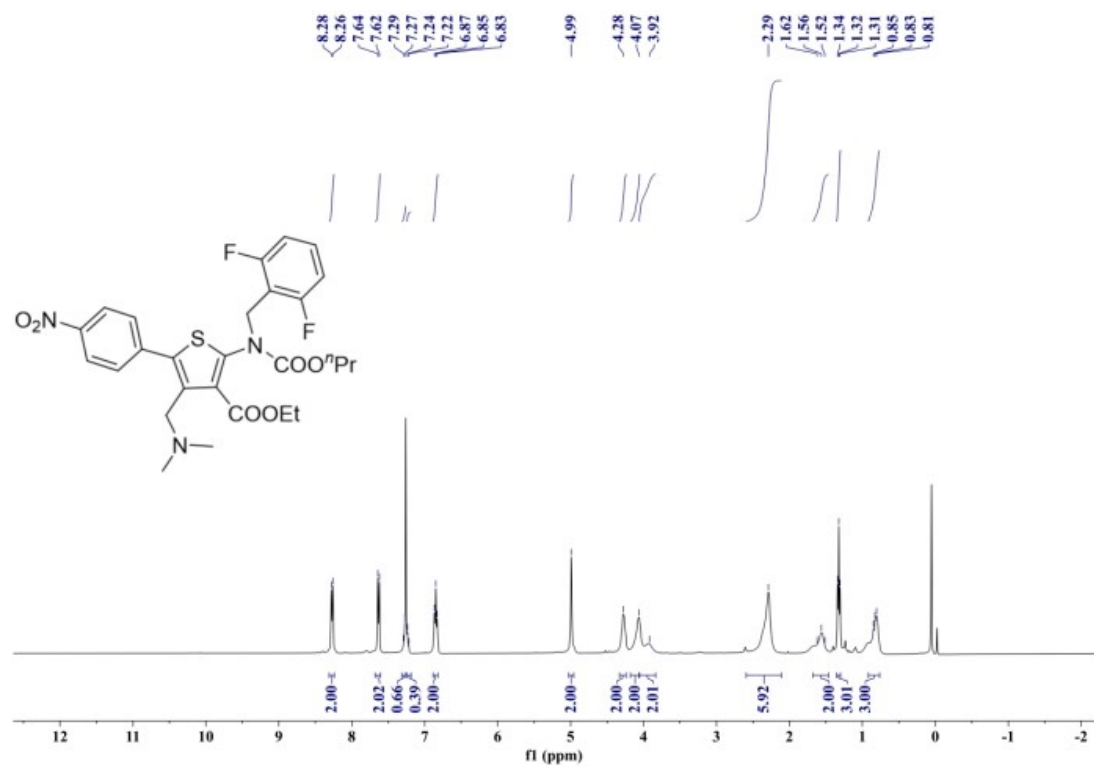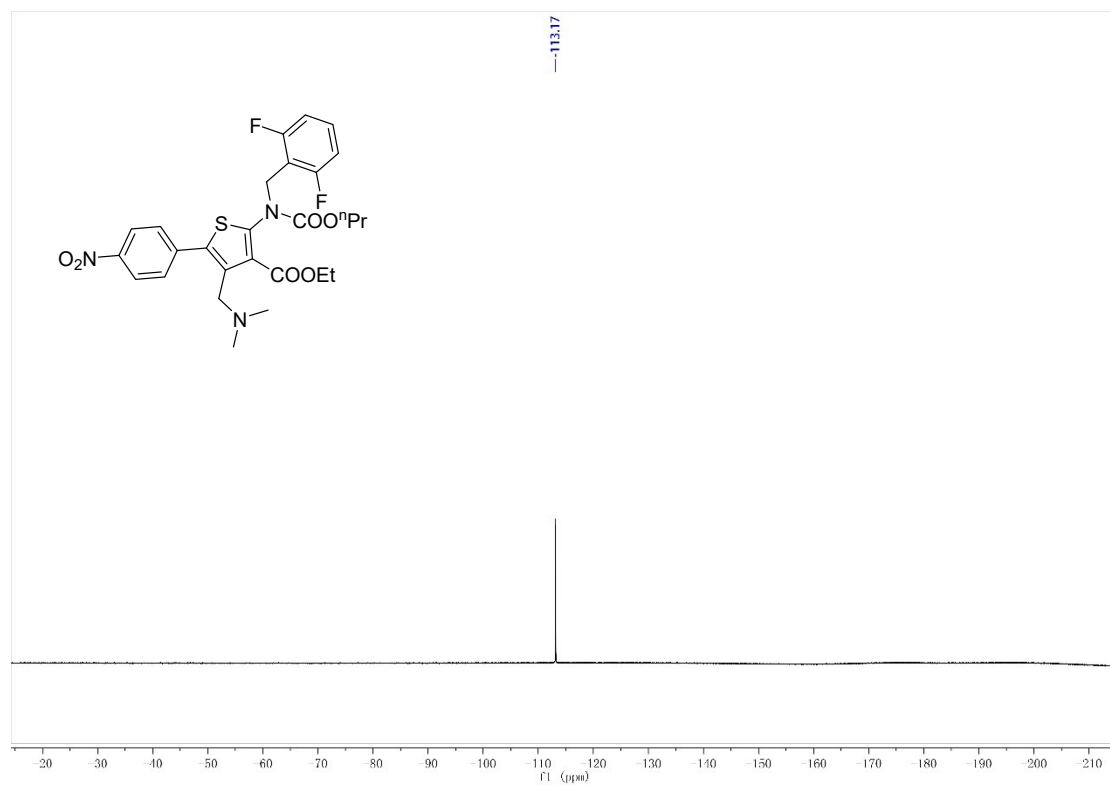

$^1\text{H}$ ,  $^{13}\text{C}$  and  $^{19}\text{F}$  NMR Spectrum of **4a** in  $\text{CDCl}_3$

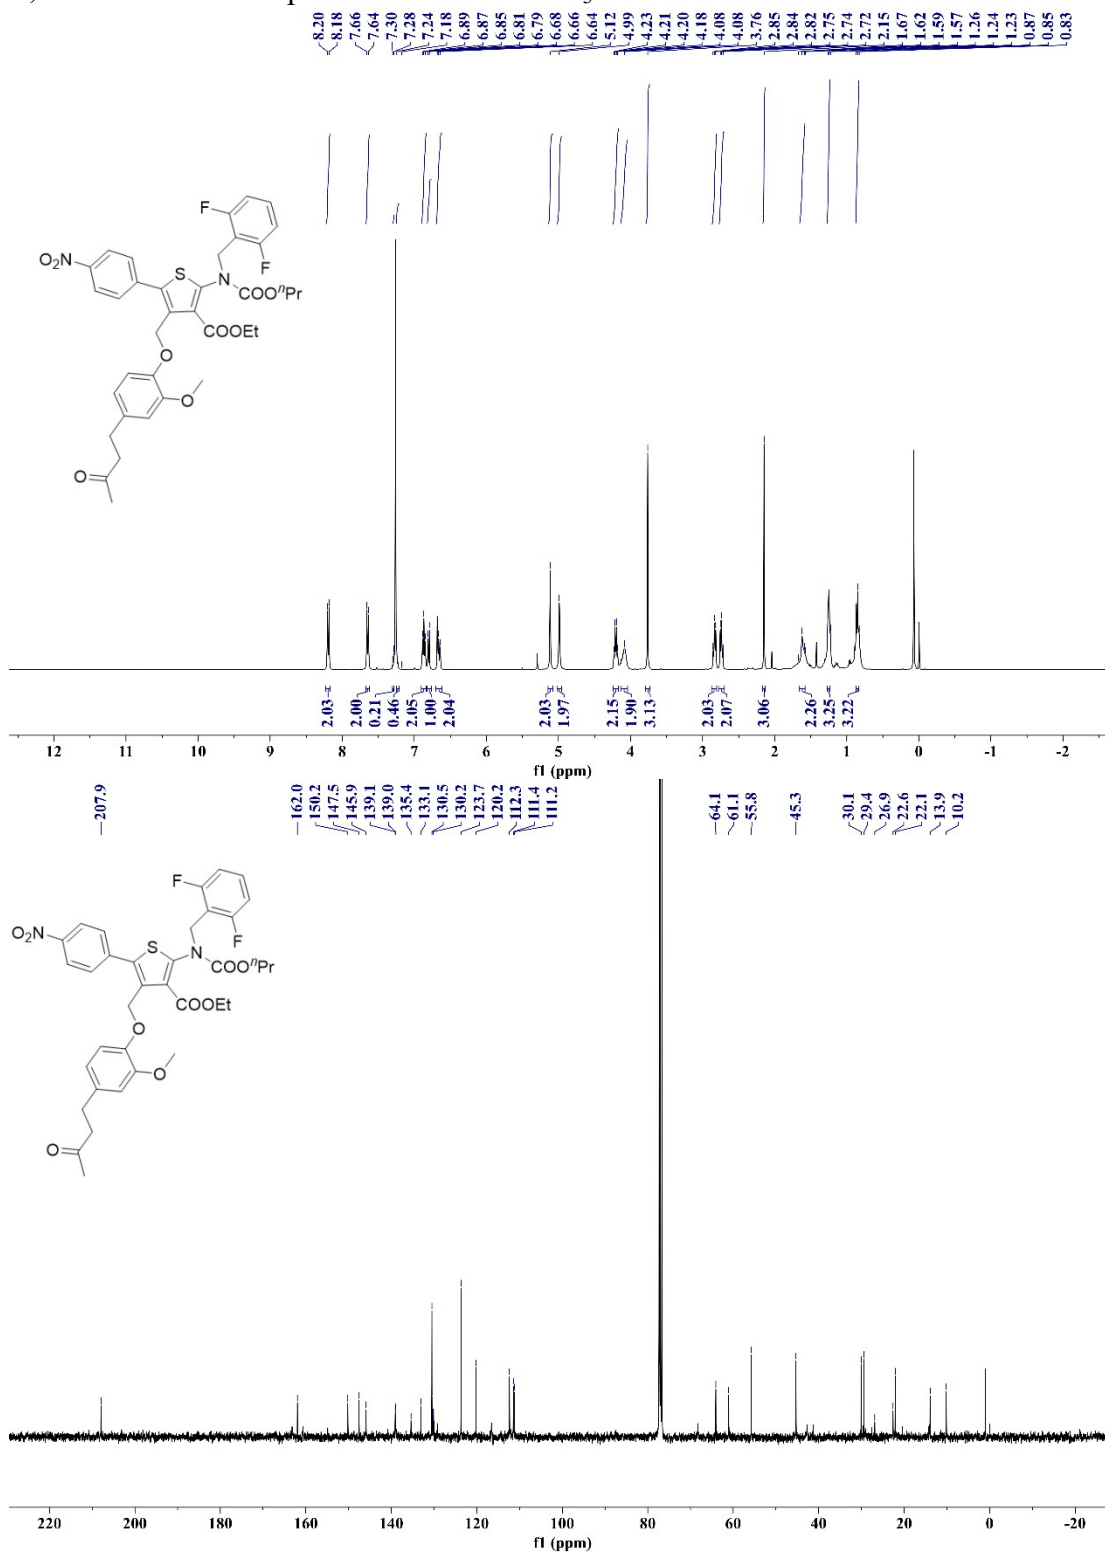

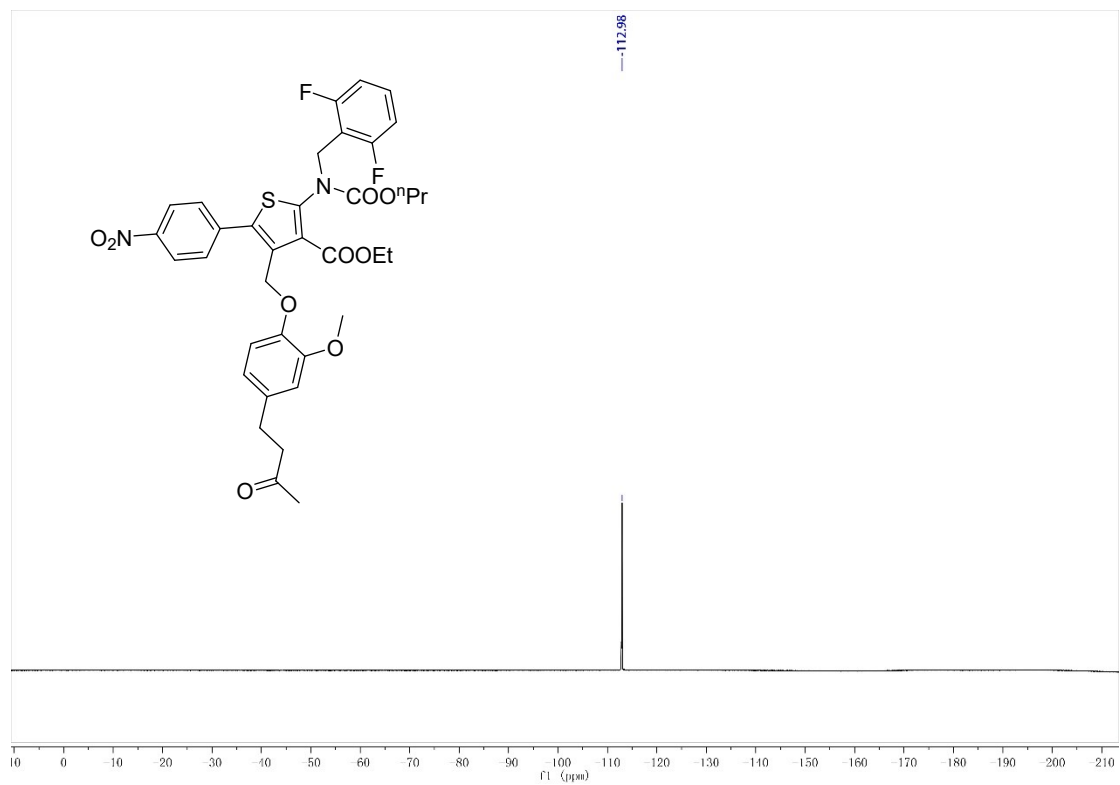

$^1\text{H}$ ,  $^{13}\text{C}$  and  $^{19}\text{F}$  NMR Spectrum of **5a** in  $\text{CDCl}_3$

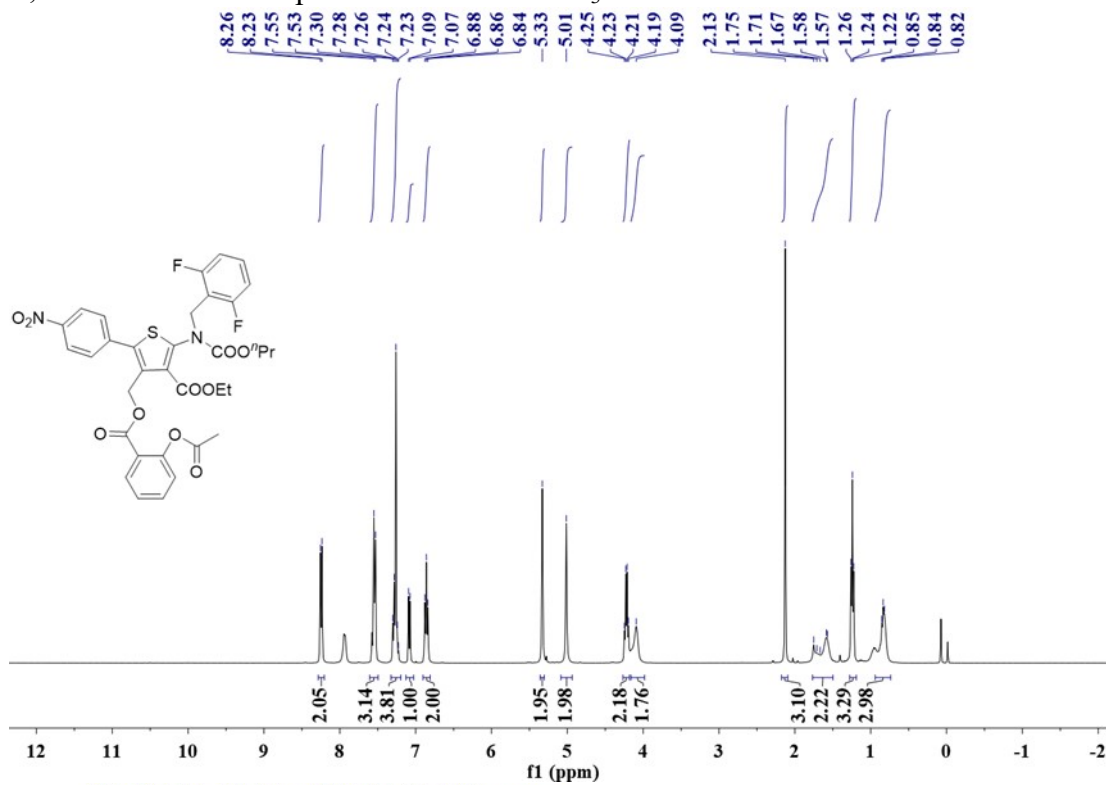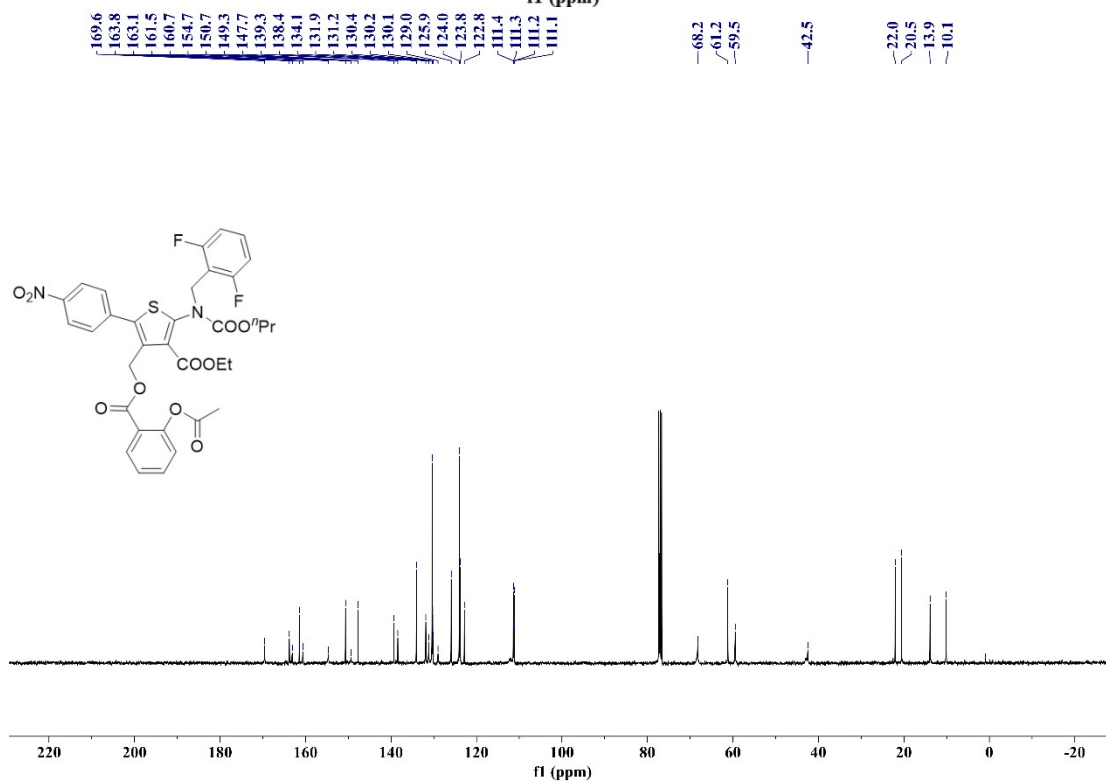

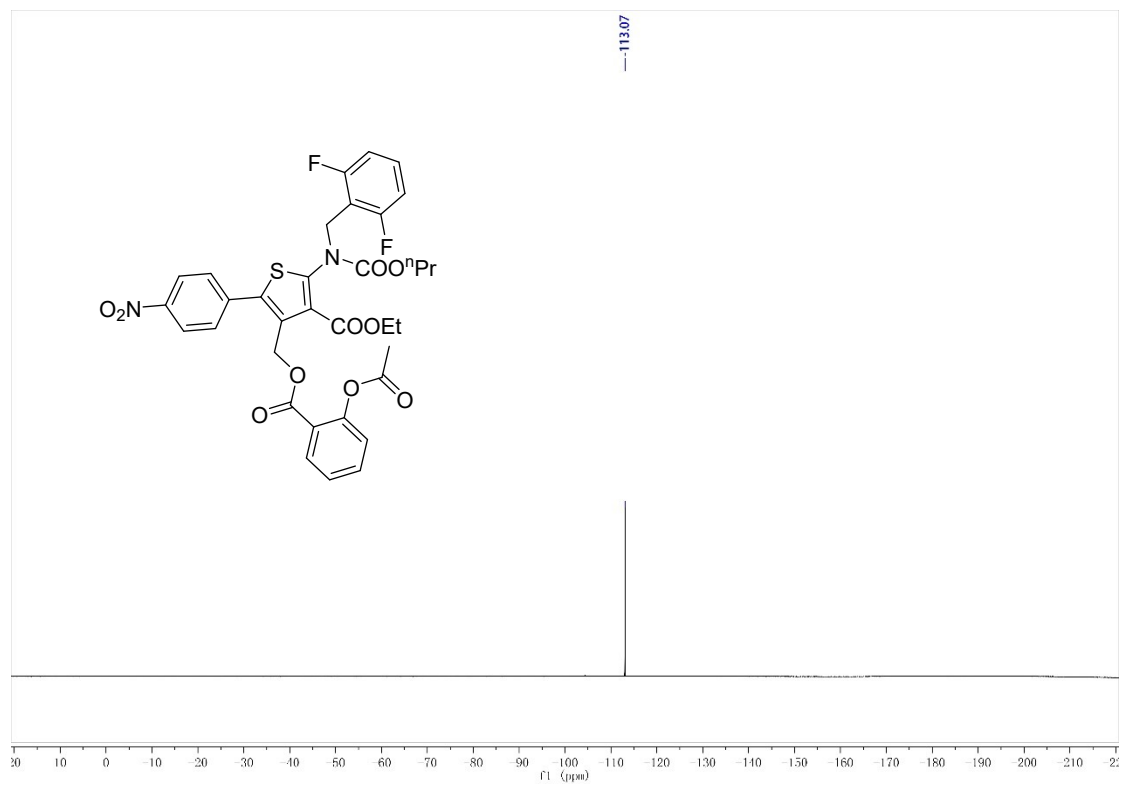

$^1\text{H}$ ,  $^{13}\text{C}$  and  $^{19}\text{F}$  NMR Spectrum of **6a** in  $\text{CDCl}_3$

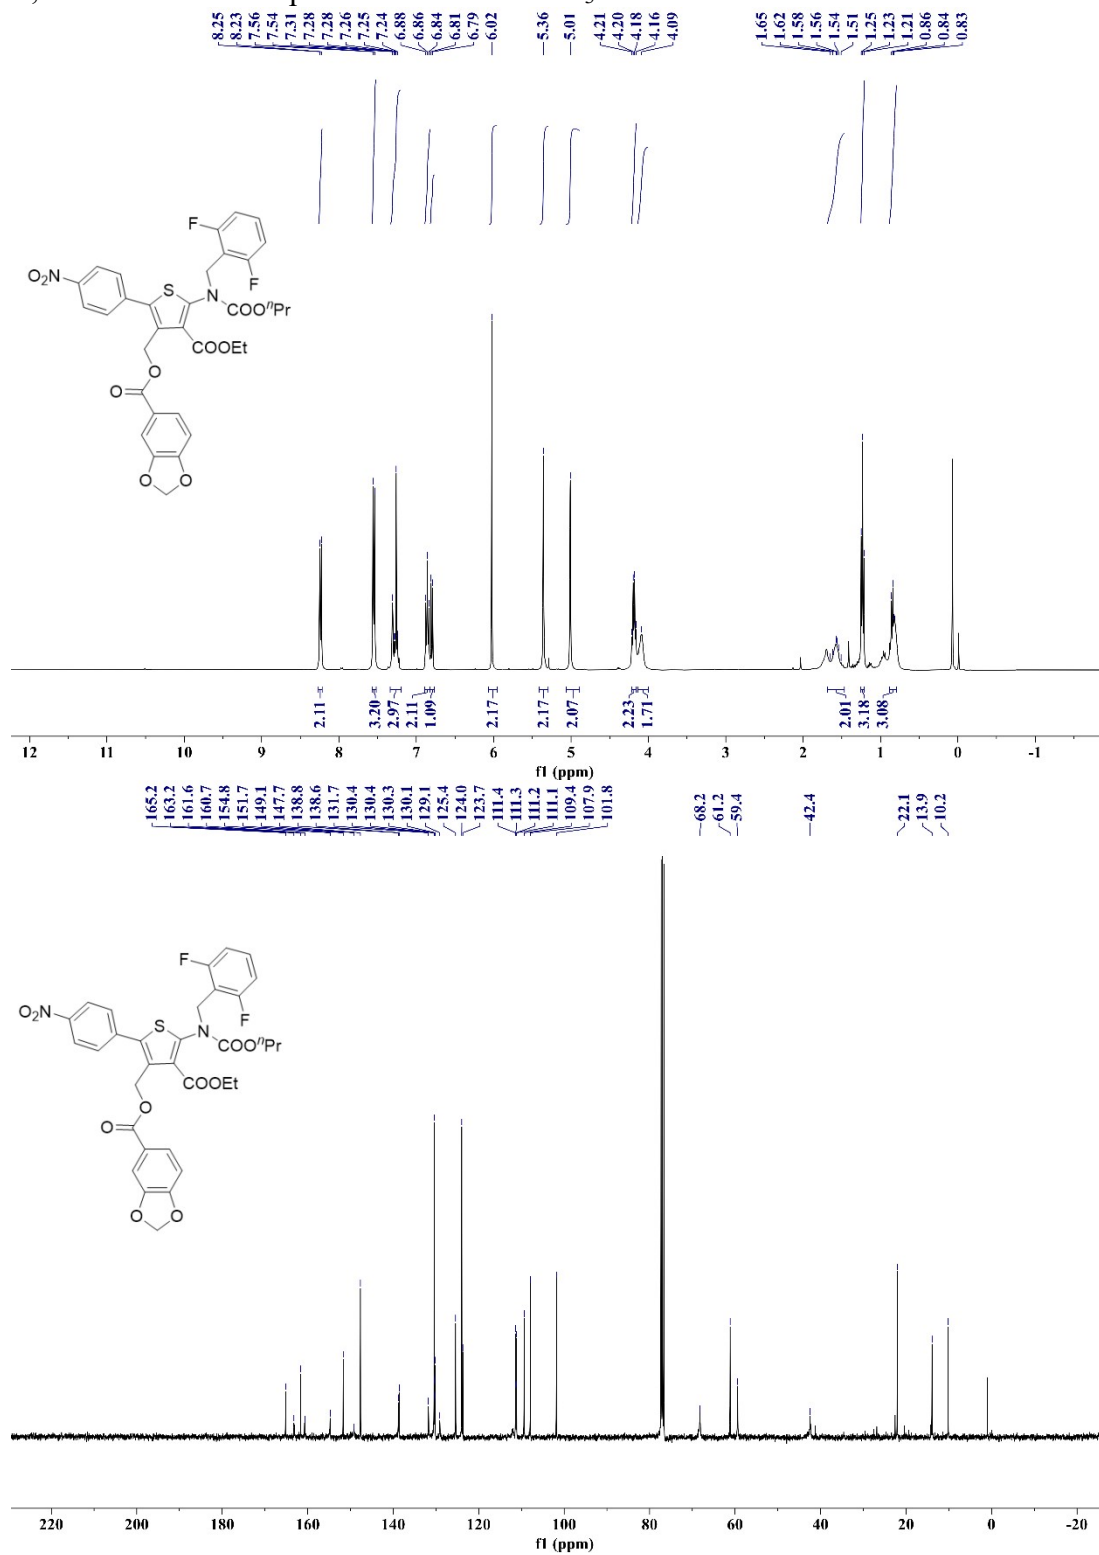

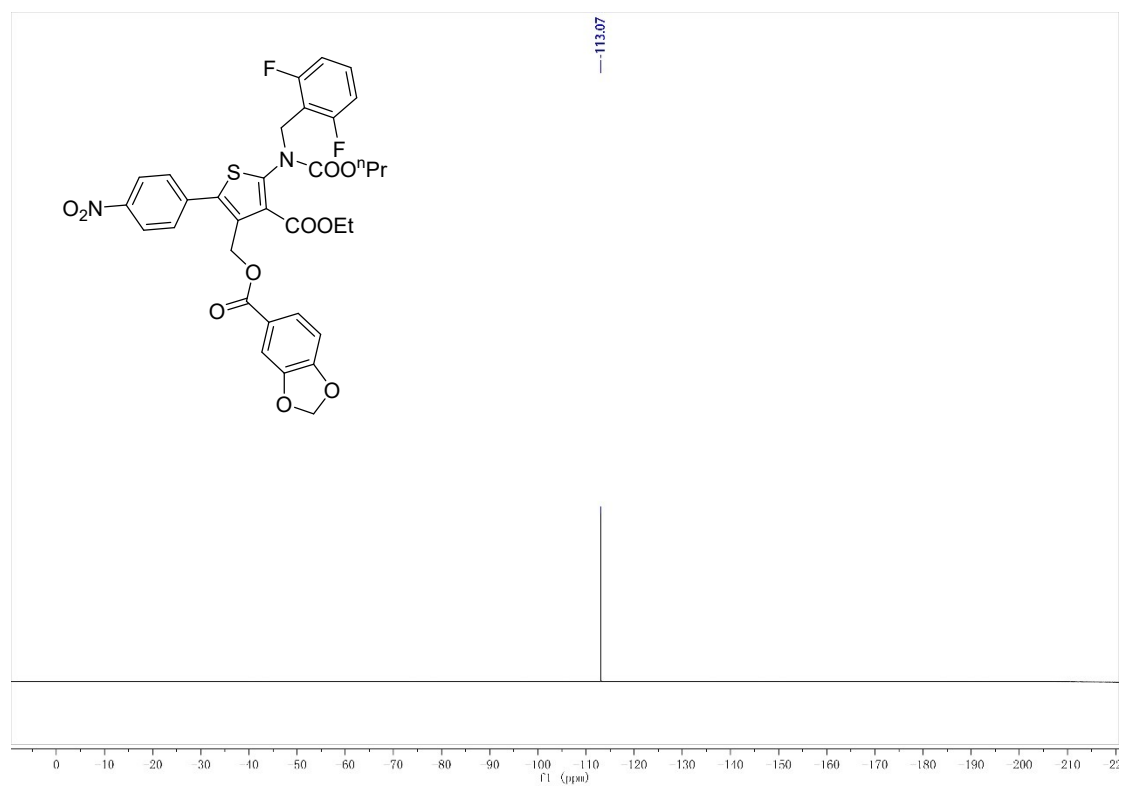

Supplement: d4ob00547c1.pdf [file d4ob00547c1.pdf]
